# Supplementary material
Source: PubMed Central journal article supplement (PMC3479585)

**Functional transcriptomics of a migrating cell in *Caenorhabditis elegans***Erich M. Schwarz<sup>a,b</sup>, Mihoko Kato<sup>a,b</sup>, and Paul W. Sternberg<sup>a,1</sup><sup>a</sup>Division of Biology and Howard Hughes Medical Institute, California Institute of Technology, Pasadena, CA, 91125, U.S.A.<sup>b</sup>These authors contributed equally to this work.<sup>1</sup>To whom correspondence should be addressed. E-mail: [pws@caltech.edu](mailto:pws@caltech.edu).

Biological Sciences: Genetics

**Supporting Information****SI Materials and Methods****Culture and Strains**

*C. elegans* were grown at 20° C. by standard methods (1). Wild-type N2 mixed-stage hermaphrodites (primarily larvae, with a few eggs and adults) were used for control RNA extractions. The strain PS4730 (*syIs128[unc-119(+)(100 µg/ml) + lag-2::YFP(50 µg/ml)]II; unc-119(ed4)III; him-5(e1490)V*) was used for LC dissections and for RNAi assays of LC migration. The following strains were used for assaying gene activity in LCs: CG308, *pha-1(e2123); him-5 (e1490) rgEx132 [pgar-3A::yfp]*; CG398, *pha-1(e2123); him-5 (e1490) rgEx132 [pacr-15::yfp pBX1]*; HC183, *qtIs20[nob-1::YFP, unc-119] unc-119(e2498)*; KP987, *lin-15(n765) nuls1[pJM24(lin-15+), pV6 (glr-1::gfp), C06E1XP (glr-1+)]*; PS5149, *syIs78[ajm-1::GFP + unc-119(+)]*; *ayIs7[hhlh-8::GFP + dpy-20(+)]*; *him-5(e1490)*; PS5309, *unc-119(ed4); syEx842[ins-18::NLS::YFP-unc-119(+)]*; PS5326, *unc-119(ed4); syEx855[ins-18::NLS::YFP-unc-119(+)]*; and IK934, *njEx386[full length ttx-4::GFP ges-1p::NLS-GFP]*, obtained from Ikue Mori (Nagoya).

**RNAi, Phenotypic Scoring, and Transgenes**

To avoid embryonic lethality (e.g., in worms from which *nhr-67*[RNAi] L4-stage LCs were being harvested), feeding RNAi was carried out on *lag-2::YFP* worms (expressing YFP in the LC) from hatching as L1 larvae to the mid-L4 stage near the end of LC migration (2). Worms were scored for LC defects by Nomarski and fluorescence microscopy (100x); Nomarski microscopy allowed more detailed and sensitive screening than the dissection microscopy previously used by Kato and Sternberg (2). It is possible that RNAi against a single *msp* gene (*msp-3*) inactivated multiple *msp* genes due to the high nucleotide similarity of genes in the *msp* family, but we know of no reason to predict such multigene effects for other RNAi targets. YFP reporters were fused to promoter regions up to 6 kb in size, microinjected, and assayed transgenically. In all other respects, RNAi feeding and YFP fusions were done as in Kato and Sternberg (2).

### LC Dissection

We harvested individual YFP-labeled LCs for RNA-seq by cutting them free of the gonad with a laser microbeam, cutting open the abdomen, and pipetting individual LCs (Fig. 1B). LCs were dissected from L3 and L4 male larvae in two stages. First, we mounted worms for laser microsurgery (3), and used the laser microbeam to sever their gonads from the LCs, since unsevered LCs proved essentially impossible to dissect. We then remounted the worms for abdominal dissection on a patch-clamp rig (3), but used a wide-mouthed, unpolished patch-clamp tube as a pipette to suck up individual LCs and transfer them to a prelubricated PCR tube. Tubes containing individual LCs were snap-frozen with liquid nitrogen and kept at  $-70^{\circ}$  C. until amplification.

### RT-PCR

For amplification, cells were thawed, lysed gently, and subjected to 3'-tailed RT-PCR by the method of Dulac and Axel (4). RT-PCRs were tested for basic quality by gel electrophoresis and secondary PCR against adjacent exons of *rpl-17*, cleaned and concentrated in TE with Qiagen MinElute PCR purification kits, quantitated by Nanodrop UV spectrophotometry, and stored at  $-20^{\circ}$  C. We also harvested, diluted, and amplified aliquots of control RNA from mass starved wild-type hermaphrodites, primarily larvae, which contained a diverse set of non-LC cell types (5). Aliquots of N2 RNA were serially diluted in RNase-free TE and independently amplified by RT-PCR. Equal aliquots of five parallel RT-PCRs for each cell type or for N2 larvae were pooled, and pools were sequenced as single-end 37-nt reads with an Illumina GA II or 50-nt reads with a HiSeq 2000. LC sets had five aliquots apiece. For N2 larvae, two sets of five aliquots were sequenced independently, their reads being merged after sequencing to provide a single N2 larval data set. As spike controls (Table S5), we used poly(A)<sup>+</sup>-tailed versions of four spiked RNAs previously used by Mortazavi et al. (6): *Apetala 2* (also termed AP2),  $\lambda$  9786 ( $\lambda$ 232),  $\lambda$  11300 ( $\lambda$ 11), and VATG (VATG3).

### RNA-seq Analysis

RNA-seq reads were mapped to the WS190 sequence of the *C. elegans* genome with bowtie (7) given the arguments "*-k 11 -v 2 --best -m 10 --strata*"; RPKM counts for WS190 gene models were computed with ERANGE 3.1 (6), both for all reads (including those mapping to multiple genome sites) and for all non-multireads (which mapped either to unique genome sites or to splice junctions). For most analyses we used the simple RPKM values taken from all reads; but for the highly similar multicopy *msp* gene family, we also examined non-multireads to ensure unambiguous LC-enriched expression of individual genes such as *msp-3* (Table S4). We set an upper limit on gene models of 1.5 kb, since by gel electrophoresis we saw little evidence of 3'-RT-PCRs extending beyond this upper bound. Reads which failed to map to the WS190 *C. elegans* genome were successively mapped with bowtie to human cDNA and the AL1 primer of Dulac and Axel (4), using the same parameters for bowtie as with WS190. Human cDNA sequences were downloaded from ENSEMBL (8), at [ftp://ftp.ensembl.org/pub/release-63/fasta/homo\\_sapiens/cdna/Homo\\_sapiens.GRCh37.63.cdna.all.fa.gz](ftp://ftp.ensembl.org/pub/release-63/fasta/homo_sapiens/cdna/Homo_sapiens.GRCh37.63.cdna.all.fa.gz).

### Genomic DNA and RNA

Genomic DNA and whole RNA was extracted from wild-type N2 *C. elegans* by previously described methods (9). Genomic DNA was used as a positive control template, distinguishable by product size from cDNA, for secondary PCRs testing single-cell RT-PCRs for success or

failure (in this study, this required oligonucleotides RPL17TEST01 and RPL17TEST012; see Detailed Protocol below).

The whole animal RNA used here was obtained and characterized in a previous study (9): it was quantitated and tested for quality with a Bioanalyzer, and successfully used for full-length RNA-seq of *C. elegans*. This RNA came from starved mixed-stage hermaphrodites; although we did not quantitate the source population, it appeared to consist mostly of L3 and L4 stage larvae, with some young adults and L2-stage larvae, and a few L1-stage larvae and eggs. We could therefore, in this study, reliably use diluted aliquots of the RNA as a background control for RT-PCRs and RNA-seq. We serially diluted aliquots of the whole RNA from  $\sim 1.4 \mu\text{g}/\mu\text{l}$  to  $\sim 1.4 \cdot 10^{-3} \mu\text{g}/\mu\text{l}$  in RNase-free T<sub>10</sub> (10 mM Tris pH 8.0). 1.0- $\mu\text{l}$  aliquots of the  $10^3$ -diluted RNA were then (like dissected LCs) subjected to RT-PCR, purified, quantitated, and pooled for RNA-seq to provide larval expression data.

### Gene Nomenclature

Gene names and many gene annotations were extracted from the WS220 release of WormBase (10) with TableMaker/xace from ACeDB 4.9.39. In a few cases, where a gene had an RNAi phenotype in the LC but only had a sequence (cosmid.number) name in WS220 (Tables 1, S4), we invented new names for them; these names were submitted to J. Hodgkin (Oxford) via WormBase and officially authorized before publication.

### Gene Annotations

Gene annotations downloaded from WS220 included protein domains from PFAM (11) and NCBI orthology annotations (KOGs, TWOGs, etc.; (12)), as well as protein features such as signal, transmembrane, coiled-coil or low-complexity sequences (predicted respectively by the programs SignalP (13), TMHMM (14), Ncoils (15), and SEG (16)). Annotations also included RNAi or mutant phenotypes annotated for a gene in WS220, with most phenotypes coming from genome-wide RNAi screens (17).

Other gene annotations were obtained from specialized databases complementary to WS220 or derived from it. GO annotations for genes (18) were downloaded from [ftp://ftp.sanger.ac.uk/pub2/wormbase/releases/WS220/ONTOLOGY/gene\\_association.WS220.wb.ce](ftp://ftp.sanger.ac.uk/pub2/wormbase/releases/WS220/ONTOLOGY/gene_association.WS220.wb.ce). Updated orthology groups (KOGs, NOGs, etc.) from eggNOG v. 2.0 (19) were downloaded from <http://eggnog.embl.de/download/orthogroups.mapping.txt.gz>. Lists of transcription factor genes were obtained from J. Thomas (pers. comm.), the Walhout laboratory (20), or the Gupta laboratory (21). Strict orthologies between human and *C. elegans* genes were determined with OrthoMCL 1.3 (22) for the protein-coding genes of human (GRCh37 set, via ENSEMBL release 56; (8)), mouse (NCBIM37 set, via ENSEMBL 56), *C. elegans* (WormBase WS210), and *C. briggsae* (WS210). A subset of human genes known to cause disease when mutated were generated from the "morbidity" index of OMIM (23), via Ensmart of ENSEMBL release 60, and mapped onto OrthoMCL groups. A set of 931 genes preferentially expressed in male sperm, hermaphrodite sperm, or both sperm types was generated from the microarray analyses of Reinke et al. (24); a smaller set of 22 genes with well-characterized roles in spermatogenesis were extracted from recent literature (25-27).

Further data for specific genes pertinent to the LC transcriptome were derived from WormBase or GenBank. Of 46 paralogous *twk* genes in the *C. elegans* genome (28), the subset expressed in LCs were identified by their gene names, KOG domains, and PFAM domains in Table S4. Conserved genes of unknown function (29) expressed in the LC were identified

through their NCBI, eggNOG, and PFAM annotations. Cytoplasmic isoforms of MOSPD1 in mammals were identified in accessions AL546517 and CX166508 of GenBank by TblastN searches of dbEST (30).

### **k-partitioning RNA-seq Data**

Expression data were log-transformed and k-partitioned with Cluster 3.0 (31), with Euclidian distances for gene clustering, no clustering of expression types, no normalization of gene or cell-type data before k-partitioning, and 10,000 repetitions (32). Statistically optimal k-partitions for transformed data sets were determined with the Gap statistic (33) as implemented in the Perl module `Statistics::Gap`, using vector space, direct k-way clustering, the H2 criterion function, and 10,000 replicates per k-value: this gave an optimal k of 3 for log-transformed data and 2 for log-normalized data, which were combined to give 6 partitions overall (Fig. S1). For log-transformed data, this successfully resolves housekeeping genes, but fails to detect and group obvious sets of genes specific to individual cell types. We therefore examined k-partitionings of k=3 through k=10, and settled on k=5 for clustering log-transformed data to obtain the division shown in Fig. 2A. Transformed and k-partitioned gene data were plotted with TreeView 1.1.5r2 (34).

### **GO Term Analysis**

The specificity of a given gene for a given cell type can be usefully considered a scalar variable, rather than a Boolean classification (35). For our GO term analyses below, we used scalar measurements of LC-enrichment. However, for our initial decisions about which genes to study with RNAi, we instead used a working definition of LC-enrichment: a gene had to have an absolute expression level of at least 0.5 RPKM, and its maximum observed expression in a wild-type LC (either L3 or L4 stage) had to be  $\geq 20x$  greater than its observed expression in whole N2 larvae; this gave us a set of 963 genes to choose from for RNAi and YFP analyses (Tables S3B, S4). We later added a small number of genes because their expression profile was striking (MSPs), they were homologs of an interesting RNAi positive (SMC subunits), or because GO term analysis indicated they were particularly important (potassium channels).

Statistically overrepresented GO terms associated with LC-enriched genes were identified with FUNC (36). Gene Ontology (GO) terms statistically overrepresented among genes with high LC-enrichment or among genes strongly upregulated in the L4 stage, were determined using the Wilcoxon-rank test in FUNC (`func_wilcoxon`), with genes classified by floating-point scores (36). GO terms overrepresented among genes belonging to k-partitions were determined using the hypergeometric test in FUNC (`func_hyper`), with genes classified by Boolean categories (36). Both tests were run with the GO term tables from [http://archive.geneontology.org/full/2010-11-01/go\\_201011-termdb-tables.tar.gz](http://archive.geneontology.org/full/2010-11-01/go_201011-termdb-tables.tar.gz), and with 10,000 repetitions. For either floating-point and Boolean scores, we considered only the 8,011 genes for which we detected expression in pooled wild-type LCs (at either the L3 or the L4 stage). A gene's floating point score was generated from the logarithm ( $\log_{10}$ ) of the ratios of that gene's expression levels in one cell type versus another: for instance,  $\log_{10}(\text{maximum wild-type LC RPKM}/\text{N2 larval RPKM})$ ;  $\log_{10}(\text{wild-type L4 RPKM}/\text{L3 RPKM})$ ;  $\log_{10}(\text{wild-type L4 RPKM}/\text{nhx-67[RNAi] L4 RPKM})$ ; etc. We used  $\log_{10}$  of gene expression ratios, rather than the original ratios, to avoid overweighting GO terms with outlier genes whose expression was exceptionally high. To allow ratios and logarithms to be computed for any gene, even if it had no observed expression in a given cell type, we defined the minimum expression level of each gene

as 0.01 rather than 0.00 RPKM, and the minimum expression ratio of each gene as  $10^{-3}$  rather than 0. A gene whose observed maximum wild-type LC expression was 1.00 RPKM, and observed N2 larval expression was 0.00 RPKM, would be considered to have a maximum LC/N2 ratio of 100 (1.00/0.01), and a  $\log_{10}(\text{maximum LC/N2})$  score of 2.0.

All Wilcoxon-rank and hypergeometric test results were filtered with FUNC's statistical refinement script before studying them further. GO terms were considered significant only if FUNC's statistical refinement script passed them at a p-value threshold of 0.01 or less, and if the ontology they belonged to (molecular\_function [GO:0003674], biological\_process [GO:0008150], or cellular\_component [GO:0005575]) had a global statistical significance of 0.05 or lower. Where refinement at  $p=0.01$  gave many terms, we sometimes produced a smaller subset by refinement at  $p=0.001$ .

While statistics defined which GO terms might be significant, making biological sense of the results and summarizing them for human readers required some judgement. Many terms that passed FUNC's refined statistical tests were unremarkable. Others were probably nontrivial, but were not easy to decipher. For instance, "locomotion" was observed among overrepresented GO terms. This is likely to reflect the uncoordinated phenotypes of genes elicited in genome-wide mass RNAi screens, which are used to infer by their phenotype that a given gene is involved in locomotion. That linker cells express many such genes was notable, but to make real sense of this was not easy, since the genes could be specialized for muscle function, neuronal function, or something else entirely. For this reason, we have focused in our summary of the GO term analysis on genes with a well-defined, narrow function that can be ascribed to a single migrating cell. We have also passed over, without comment, terms that are statistically significant but very broad.

### **Cross-comparison to known sperm genes and testing MSP/MSD gene expression for reproducibility**

Reinke et al. identified a set of 970 genes with preferential activity in male sperm, hermaphrodite sperm, or both sperm types (24). We linked 932 of these genes to current gene names in WormBase WS220 (others may have been designated as pseudogenes, or have undergone splits or fusions of their gene models since 2004). Comparing these 932 genes known to be active in sperm to the 10,064 genes that we detected in wild-type LCs, we found 569 LC genes with Reinke annotations (male\_sperm, herm\_sperm, or shared\_sperm; Table S4). Among the smaller set of 8,011 genes expressed in pooled wild-type LCs, we found 389 such sperm genes.

In pooled LCs, we observed strong upregulation for MSP and MSD genes from the wild-type L3 to the wild-type L4 stage, but much weaker upregulation to *nhr-67*(RNAi) L4 (Fig. 2C). For MSP genes, mean expression levels were 0.04 and 9.76 RPKM in pooled L3-stage and *nhr-67*(RNAi) L4-stage LCs (with ranges of 0.00-0.80 and 0.00-215 RPKM, respectively), but rose to 148 RPKM in pooled wild-type L4-stage LCs (range 1.01-1,372 RPKM). For MSD genes, mean expression values were 2.14 and 2.84 RPKM in L3-stage and *nhr-67*(RNAi) L4-stage LCs (with ranges of 0.00-36.5 and 0.00-34.7 RPKM), but rose to 54.9 RPKM in wild-type L4-stage LCs (range 0.00-775 RPKM).

To statistically evaluate these data, we scored the 8,011 genes and their subset of 389 sperm-associated genes by their ratio of gene expression in wild-type pooled L4 versus L3-stage LCs, and performed a Wilcoxon test of their ranking with the Perl module Statistics::Test::WilcoxonRankSum (version 0.0.6). We found that the 389 sperm genes were

overrepresented among genes upregulated between L3- and L4-stage LCs with high significance ( $p < 10^{-6}$ ; Table S13). This significance remained if we considered only 345 genes which did not encode a PFAM domain for major sperm protein (PF00635) in WormBase WS220 ( $p < 10^{-6}$ ), or even smaller gene sets annotated by Reinke et al. as enriched in male or hermaphrodite sperm only (24 and 37 genes, respectively;  $p = 1.2 \cdot 10^{-5}$  and  $7.3 \cdot 10^{-5}$ ).

To determine whether upregulation of MSP/MSD genes was reproducible or due to sporadic RNA-seq signals (e.g., from a freak contamination event during dissection), we also examined the expression levels of ~60 LC genes encoding MSP domains in RNA-seq data from individual, rather than pooled, LCs. Expression of these ~60 genes was reproducibly strong in five individual wild-type L4-stage LCs (median = 0.50 RPKM), while being substantially lower among five individual *nhr-67*(RNAi) L4-stage LCs (median = 0.00 RPKM); the median expression levels of *msh-3* in these two sets of individual LCs were 84.1 and 1.14 RPKM, respectively.

### Statistical analysis of differential gene expression

We computed statistical significance scores for differential gene expression with DESeq 2.10 (37). As input data, we used counts of reads mapped to genes from the RNA-seq data individually amplified and sequenced LCs, and from two RNA-seq analyses of whole larval RNA (Table S2) which we had previously pooled as a single larval data set. This gave us five biological replicates of each LC type and two technical replicates of whole larvae. We compared L3- to L4-stage LCs, wild-type to *nhr-67*(RNAi) L4-stage LCs, and wild-type LCs (both L3 and L4) to whole larvae. For the LC/larval comparison, we grouped all ten L3- and L4-stage LCs into a single LC condition. For each comparison, we first estimated dispersions of gene activity with `estimateDispersions(cds1, method = "per-condition", sharingMode = "maximum", fitType = "local")`, and then ran a negative binomial test for differential gene expression with `nbinomTest(cds1, "[condition 1]", "[condition 2]")`. DESeq generates both raw p-values (uncorrected for multiple hypothesis testing with thousands of genes) and false discovery rates (p-values corrected for multiple hypothesis testing); both statistical values for each differential gene analysis are given in Table S4. At least two LC-expressed genes that we showed experimentally to be required for normal LC migration (*hlh-19* and *srsx-18*) scored as insignificant by these criteria, probably because each gene was detected in only one out of 10 wild-type LCs, and thus resembled statistical noise. Nevertheless, DESeq did indicate which genes had the most robust signal of differential gene expression, given the limits of single-cell RNA-seq.

## Supporting Figures

**Figure S1. k-partitioning of LC Genes With Six Partitions Defined by the Gap Statistic (Methods; (33)).** As in Fig. 2A, expression data from 8,011 genes expressed in pooled wild-type LCs ("LC genes") were compared between LC types (L3, L4, *nhr-67*[RNAi] L4), and mass larvae (Table S1, S3). Yellow and blue denote high and low expression levels, respectively. LC genes were split with a statistically optimal  $k=3$  for log-transformed data; in parallel, they were split with an optimal  $k=2$  for log-normalized data; finally, the  $k=2$  split was superimposed on the  $k=3$  split of the log-transformed data, to give the six partitions shown here. Initial  $k=3$ -derived and subsequent  $k=2$ -derived splits are shown with black and grey dividing lines, respectively. This method is statistically less arbitrary than the simpler  $k=5$  partitioning used in Fig. 2A, but gives groupings of genes that are less intuitively clear.

**Figure S2. LC Genes Also Expressed in Sperm are More Strongly Upregulated in Wild-type L4-Stage LCs Than in *nhr-67*(RNAi) L4-Stage LCs.** RNA-seq data from 8,011 genes expressed in pooled wild-type LCs are shown, with the ratios of observed gene activity for wild-type L4-stage/wild-type L3-stage LCs (x-axis) versus *nhr-67*(RNAi) L4-stage/wild-type L3-stage LCs (y-axis). The following subsets of genes are highlighted: *msp-3*; 43 other "sperm/MSP" genes, which were previously found to be expressed in sperm (24) and which also encode proteins with MSP domains (PFAM domain PF00635; Table S4); 345 "sperm/non-MSP" genes, which are sperm-expressed but which do not encode MSP domains; 15 "MSP/non-sperm" genes, which encode MSP domains but which were not previously observed to be sperm-expressed; and the overall background of LC genes. Most LC genes with previously known sperm expression, regardless of whether they encode MSP domains or not, are strongly upregulated from the L3 to the wild-type L4 stages, but show much less upregulation from the L3 to the *nhr-67*(RNAi) L4 stages. This skew is statistically discernable as well (Table S13).

**Figure S3. Activity of *msp-3* Transgene (A,B) and RNAi (C,D) in Linker Cell.** (A) Nomarski image and (B) fluorescence image of a migrating L4-stage LC (arrow), followed by the gonad (row of cells to the left). A YFP transgene driven by 3.3-kb of the *msp-3* promoter region (Table S10) expresses in the LC (arrow), but not in the gonad trailing behind it. Cells between the linker cell and the body wall are ventral cord neurons or other cells in that plane. (C) A wild-type mid-L4-stage LC expressing cytoplasmic YFP is typically elongated and pointed towards its direction of migration (overlay of Nomarski and fluorescence images). (D) In a similarly staged LC subjected to *msp-3*(RNAi), the LC's migration is delayed, and its shape is abnormally rounded.

## Supporting Tables

Table S1. Expressed Genes Detected in Pooled LCs and Larvae.

| Condition:                               | Reads sequenced: | Mapped to <i>C. elegans</i> : | Mapped to human cDNA: | Mapped to AL1:        | Unmapped reads:       | Genes:       |
|------------------------------------------|------------------|-------------------------------|-----------------------|-----------------------|-----------------------|--------------|
| In <i>C. elegans</i>                     | n/a              | n/a                           | n/a                   | n/a                   | n/a                   | 20,252       |
| L3-stage LC pool                         | 14,291,807       | 5,496,633<br>(38.5%)          | 906,562<br>(6.3%)     | 4,874,927<br>(34.1%)  | 3,007,274<br>(21.1%)  | 5,740 [28%]  |
| L4-stage LC pool                         | 10,303,633       | 4,765,657<br>(46.3%)          | 1,485,637<br>(14.4%)  | 1,484,930<br>(14.4%)  | 2,564,303<br>(24.9%)  | 6,603 [33%]  |
| <i>nhr-67</i> (RNAi)<br>L4-stage LC pool | 13,571,986       | 4,276,676<br>(31.5%)          | 2,023,122<br>(14.9%)  | 2,197,942<br>(16.2%)  | 5,072,207<br>(37.4%)  | 5,290 [26%]  |
| L3- and L4-stage<br>LC pool              | 24,595,440       | 10,262,290<br>(41.7%)         | 2,392,199<br>(9.7%)   | 6,359,857<br>(25.9%)  | 5,571,577<br>(22.7%)  | 8,011 [40%]  |
| Mixed larvae                             | 26,268,281       | 20,040,697<br>(76.3%)         | 14,243<br>(0.05%)     | 4,698,805<br>(17.9%)  | 1,509,867<br>(5.7%)   | 13,146 [65%] |
| Any pooled<br>source                     | 64,435,707       | 34,579,663<br>(53.7%)         | 4,429,654<br>(6.9%)   | 13,256,604<br>(20.6%) | 12,153,651<br>(18.8%) | 13,939 [69%] |

Reads of 38 nt were mapped with bowtie to the WS190 release of the *C. elegans* genome, the human cDNA sequences from ENSEMBL 63, or the PCR primer AL1 (Methods). For each cell type or combination of cell types, percentages of reads are against the total reads sequenced. Manual dissection of LCs clearly introduced human poly(A)<sup>+</sup> RNA to our RT-PCRs, since RNA-seq of undissected whole larvae gave much lower frequencies of reads mapping to human cDNA. However, the predominant contaminant was the PCR primer AL1, found in all four read sets. We do not know the source of reads which we failed to map to human cDNA or AL1, but they might arise from other contaminants in the *C. elegans* cultures, such as the bacteria used to grow worms. Genes are from the WS190 annotation of *C. elegans*; there were 20,252 in the entire genome, of which 69% showed detectable expression in at least one of our RNA-seq data sets. Of the genes for which we detected expression at all, 94% were detected in whole larvae, which was reasonable given the wide variety of larval cell types (5).



**Table S2. Expressed Genes Detected in Individual LCs and Larval RNA Samples.**

| <b>Condition:</b>    | <b>Reads sequenced:</b> | <b>Mapped to <i>C. elegans</i>:</b> | <b>Genes:</b>  |
|----------------------|-------------------------|-------------------------------------|----------------|
| In <i>C. elegans</i> | n/a                     | n/a                                 | 20,252         |
| L3.indiv1            | 15,113,212              | 2,866,508 (19.0%)                   | 2,983 (14.7%)  |
| L3.indiv2            | 1,348,957               | 626,707 (46.5%)                     | 4,133 (20.4%)  |
| L3.indiv3            | 20,094,930              | 10,339,482 (51.5%)                  | 4,238 (20.9%)  |
| L3.indiv4            | 15,355,272              | 7,102,435 (46.3%)                   | 3,433 (17.0%)  |
| L3.indiv5            | 18,612,313              | 5,618,173 (30.2%)                   | 2,868 (14.2%)  |
| L4.indiv1            | 19,692,491              | 11,485,407 (58.3%)                  | 7,267 (35.9%)  |
| L4.indiv2            | 21,182,740              | 12,441,710 (58.7%)                  | 6,384 (31.5%)  |
| L4.indiv3            | 19,729,469              | 424,071 (2.2%)                      | 3,278 (16.2%)  |
| L4.indiv4            | 1,232,463               | 420,408 (34.1%)                     | 4,436 (21.9%)  |
| L4.indiv5            | 19,979,116              | 8,146,424 (40.8%)                   | 4,053 (20.0%)  |
| nhr.indiv1           | 13,328,842              | 297,067 (2.2%)                      | 2,744 (13.6%)  |
| nhr.indiv2           | 15,429,375              | 7,763,475 (50.3%)                   | 4,855 (24.0%)  |
| nhr.indiv3           | 11,453,227              | 6,231,720 (54.4%)                   | 4,046 (20.0%)  |
| nhr.indiv4           | 4,599,820               | 767,189 (16.7%)                     | 2,871 (14.2%)  |
| nhr.indiv5           | 17,915,437              | 5,819,769 (32.5%)                   | 3,760 (18.6%)  |
| Mixed larvae 1       | 16,155,370              | 11,250,288 (69.6%)                  | 12,856 (63.5%) |
| Mixed larvae 2       | 10,112,911              | 8,790,409 (86.9%)                   | 9,485 (46.8%)  |

Reads, mapping to the *C. elegans* genome, and gene counts were computed as in Table S1. The original reads for individual LCs were 50 nt long, but were truncated in silico to 38 nt before mapping to allow consistency between analyses. Data from the two larval samples were merged for most analyses of pooled larval RNA-seq, but were analyzed separately here. Note that gene expression levels for each cell were normalized by being computed as RPKM (6), so that comparisons of gene expression levels between different individual cells or their mean values (Table S6) were feasible.

**Table S3. Subsets of Genes With Expression Detected in Wild-type LCs.****S3A.** Subsets of genes with expression detected in pooled versus individual LCs.

| <b>Condition:</b>                                                   | <b>Genes:</b> |
|---------------------------------------------------------------------|---------------|
| Any wild-type LCs, pooled or individual, L3- or L4-stage            | 10,064 [100%] |
| Pooled L3- or L4-stage pooled LCs                                   | 8,011 [79.6%] |
| Individual L3- or L4-stage LCs (in aggregate)                       | 9,968 [99.0%] |
| Both pooled and individual L3- or L4-stage LCs (detected both ways) | 7,915 [78.6%] |
| Only pooled L3- or L4-stage LCs, not individual ones                | 96 [1.0%]     |
| Only individual L3- or L4-stage LCs (in aggregate), not pooled ones | 2,053 [20.4%] |

**S3B.** Subsets of genes with expression detected in pooled LCs.

| <b>Condition:</b>                                                                                                                                      | <b>Genes:</b> |
|--------------------------------------------------------------------------------------------------------------------------------------------------------|---------------|
| Wild-type L3- or L4-stage LCs                                                                                                                          | 8,011 [100%]  |
| $\geq 20x$ greater RPKM in wild-type LCs (defining larger RPKM from either L3- or L4-stage LCs) than in whole N2 larvae                                | 1,097 [13.7%] |
| $\geq 20x$ greater RPKM in LCs than in whole larvae, along with RPKM $\geq 0.5$                                                                        | 963 [12.0%]   |
| $\geq 20$ -fold differences of RPKM (either greater or lower) between L3- and L4-stage LCs                                                             | 3,963 [49.5%] |
| $\geq 20$ -fold greater RPKM in wild-type L4-stage LCs than in <i>nhr-67</i> (RNAi) L4-stage LCs                                                       | 2,478 [30.9%] |
| $\geq 20$ -fold greater RPKM in wild-type than in <i>nhr-67</i> (RNAi) L4-stage LCs, and also $\geq 20$ -fold greater RPKM in L4- than in L3-stage LCs | 1,473 [18.4%] |
| $\geq 20$ -fold lower RPKM in wild-type L4-stage LC than in <i>nhr-67</i> (RNAi) L4-stage LCs                                                          | 903 [11.3%]   |
| $\geq 20$ -fold lower RPKM in wild-type versus <i>nhr-67</i> (RNAi) L4-stage LCs, and also $\geq 20$ -fold lower RPKM in L4-stage than in L3-stage LCs | 504 [6.3%]    |
| Parallel $\geq 20$ -fold changes of RPKM for L4-stage LCs versus either L3-stage or <i>nhr-67</i> (RNAi) L4-stage LCs (1,473 + 504 genes)              | 1,977 [24.7%] |
| Transcription factor genes expressed in L3- or L4-stage LCs                                                                                            | 426 [5.3%]    |
| Transcription factor genes expressed in L3- or L4-stage LCs, with $\geq 20$ -fold differences of RPKM between wild-type versus <i>nhr-67</i> (RNAi) L4 | 180 [2.2%]    |

**S3C.** Subsets of genes with expression detected in individual LCs, with comparisons between types of LCs being done between the means of individuals from each type.

| <b>Condition:</b>                                                                                                       | <b>Genes:</b> |
|-------------------------------------------------------------------------------------------------------------------------|---------------|
| Wild-type L3- or L4-stage LCs                                                                                           | 9,968 [100%]  |
| $\geq 20x$ greater RPKM in wild-type LCs (defining larger RPKM from either L3- or L4-stage LCs) than in whole N2 larvae | 1,840 [18.5%] |
| $\geq 20$ -fold differences of RPKM (either greater or lower) between L3- and L4-stage LCs                              | 3,984 [40.0%] |

|                                                                                                                                                        |               |
|--------------------------------------------------------------------------------------------------------------------------------------------------------|---------------|
| $\geq 20$ -fold greater RPKM in wild-type L4-stage LCs than in <i>nhr-67</i> (RNAi) L4-stage LCs                                                       | 2,949 [30.0%] |
| $\geq 20$ -fold greater RPKM in L4-stage LCs than in L3-stage LCs                                                                                      | 3,003 [30.1%] |
| $\geq 20$ -fold greater RPKM in wild-type than in <i>nhr-67</i> (RNAi) L4-stage LCs, and also $\geq 20$ -fold greater RPKM in L4- than in L3-stage LCs | 1,929 [19.4%] |
| $\geq 20$ -fold lower RPKM in wild-type L4-stage LC than in <i>nhr-67</i> (RNAi) L4-stage LCs                                                          | 736 [7.4%]    |
| $\geq 20$ -fold lower RPKM in L4-stage LCs than in L3-stage LCs                                                                                        | 981 [9.8%]    |
| $\geq 20$ -fold lower RPKM in wild-type versus <i>nhr-67</i> (RNAi) L4-stage LCs, and also $\geq 20$ -fold lower RPKM in L4-stage than in L3-stage LCs | 277 [2.8%]    |
| Parallel $\geq 20$ -fold changes of RPKM for L4-stage LCs versus either L3-stage or <i>nhr-67</i> (RNAi) L4-stage LCs (1,929 + 277 genes)              | 2,206 [22.1%] |
| Transcription factor genes expressed in L3- or L4-stage LCs                                                                                            | 538 [5.4%]    |
| Transcription factor genes expressed in L3- or L4-stage LCs, with $\geq 20$ -fold differences of RPKM between wild-type versus <i>nhr-67</i> (RNAi) L4 | 207 [2.1%]    |

**Table S4. Names, Expression Levels, and Annotations for the 10,064 Genes Whose Expression Was Detected in Wild-type L3- or L4-stage LCs.** [Data are in the Excel file "Dataset S1".] These include both the 8,011 genes detected in pooled L3 and L4 LCs, and an additional 1,957 genes which were detected only in RNA-seq data from individually amplified L3 and L4 LCs. (Conversely, only 96 genes detected in pooled LCs were not also detected in individual LCs.) Columns denote the following data: "Gene" gives the full gene identifier (WormBase name, sequence name, and CGC name) of a gene. "L3\_pool", "L4\_pool", "nhr\_pool", and "larvae\_pool" denote the RPKM for a given gene observed in pooled L3 LCs, L4-stage LCs, *nhr-67*(RNAi) L4-stage LCs, and whole wild-type (N2) larvae. "L3\_pool\_nm" through "larvae\_pool\_nm" denote the same data, but with RPKMs calculated only from non-multireads (unique or spliced reads, which are important for ascertaining locus-specific expression of genes like *msp-3* that belong to highly duplicated gene families). "max\_wtLC\_pool/larvae\_pool" gives the ratio of the highest observed expression in pooled wild-type L3-stage or L4-stage LCs to expression in whole larvae, with a minimum RPKM of 0.01 when no expression was observed; "max\_wtLC\_pool\_nm/larvae\_pool\_nm" denotes the same ratio for non-multiread RPKMs; and "max\_wtLC\_indiv\_mean/larvae\_pool" denotes the same ratio, but with maximum LC expression taken from the mean RPKMs per gene of individually amplified L3 or L4 LCs. "L3.indiv\_Mean", "L4.indiv\_Mean", and "nhr.indiv\_Mean" give the mean RPKMs per gene for each set of RNA-seq data from five individual L3, L4, or *nhr-67*(RNAi) LCs. "L3.vs.L4 p-value" and "L3.vs.L4 FDR" give the p-value (uncorrected for multiple hypothesis testing) and the false discovery rate (corrected for such testing) for differential expression of genes, as determined by DESeq (37) with RNA-seq data from individually amplified wild-type L3- versus L4-stage LCs (Table S2). "L4.vs.nhr p-value", "L4.vs.nhr FDR", "LC.vs.larvae p-value", and "LC.vs.larvae FDR" give the same values, for comparisons of individual wild-type versus *nhr-67*(RNAi) L4-stage LCs and of wild-type L3- and L4-stage LCs versus two technical replicates of whole larval RNA. "Protein size(s)" lists the sizes of protein products. "Protein feature" lists predicted features such as signal, transmembrane, coiled-coil or low-complexity sequences, predicted respectively by the programs SignalP (13), TMHMM (14), Ncoils (15), and SEG (16). "Reinke\_class" lists 569 genes detected in wild-type LCs (from a set of 931 such genes in the *C. elegans* genome) that are preferentially expressed in male sperm, hermaphrodite sperm, or both sperm types, as determined by the microarray analyses of Reinke et al. (24). "Known\_sperm\_genes" indicates 22 genes with well-characterized roles in *C. elegans* spermatogenesis (25-27). "TF" indicates whether a gene's product was predicted to be a transcription factor by J. Thomas (pers. comm.), the Walhout laboratory (20), or the Gupta laboratory (21). "Disease ortholog" denotes orthology to a human disease gene. "Strict human ortholog" denotes strict orthology to a human gene. "NCBI KOG" and "Bork KOG" list orthology annotations by NCBI (12) and eggNOG 2.0 (19), respectively. "PFAM domain" lists any such domains annotated in WormBase WS220. "RNAi\_screen" lists whether a gene was screened by RNAi, with "nonwt\_RNAi" and "WT\_RNAi" indicating that a phenotype either was or was not observed. "WBPhenotype" lists any RNAi or mutant phenotypes annotated for a gene in WS220, with most phenotypes coming from mass RNAi screens. "NOT WBPheno" indicates that a gene was annotated as negative for such phenotypes in WS220. "k-cluster group" indicates which of the five k-cluster groups shown in Fig. 2A a gene belonged to. "LC-enriched GO term" lists any genes annotated for a GO term mentioned in the main text as being both overrepresented in LC-enriched genes (the full term list is in Table S11) and being particularly noteworthy (e.g., "axon"). "L4-enriched GO term" does the same for

GO terms listed in Table S12C as being associated with genes upregulated in L4 LCs by NHR-67. "L3.indiv1" through "nhr.indiv5" give expression data in RPKM for the individually amplified LCs themselves; "L3.indiv1\_nm" through "nhr.indiv5\_nm" give these values for non-multireads only. Detailed annotations for LC genes in Table S4 are derived from the WS220 release of WormBase, which contains references for their phenotypic data.

**Table S5. RPKM Counts for Spikes in RT-PCRs.**

| Spike type      | RPKM of a given pooled RT-PCR type |             |                                     |              | Estimated.<br>spiked txs.<br>per RT-PCR: |
|-----------------|------------------------------------|-------------|-------------------------------------|--------------|------------------------------------------|
|                 | L3-stage LC                        | L4-stage LC | <i>nhr-67</i> (RNAi)<br>L4-stage LC | Whole larvae |                                          |
| VATG            | 10,834.44                          | 937.56      | 3,648.17                            | 2.73         | 5,000                                    |
| $\lambda$ 11300 | 457.16                             | 73.04       | 338.72                              | 0.82         | 500                                      |
| $\lambda$ 9786  | 5.63                               | 0.40        | 6.97                                | 0.00         | 50                                       |
| Apetala 2       | 0.00                               | 0.00        | 0.00                                | 0.00         | 5                                        |

**Table S6. Correlation of Measured Gene Expression Levels Between Cells and Pools.**

**S6A.** The correlations ( $r^2$ ) of gene expression levels between individual, mean individual, or pooled LCs versus mean individual or pooled LCs or whole larvae. These comparisons used all 10,064 genes observed in either pooled or individual wild-type L3- or L4-stage LCs. Since the pools were made from aliquots of the RT-PCR products from single cells, this comparison shows technical rather than biological replicability: RNA-seq with a pool of single RT-PCRs gives a result quite similar to the data obtained by averaging RNA-seq data from RT-PCRs sequenced individually. It also shows that the agreement between different cells varied, with one notably divergent L4 cell (L4.indiv3) in our data set. "nhr" denotes "*nhr-67*(RNAi) L4-stage"; "im" denotes "individual mean"; "pl" denotes "pool".

|                | L3 pl | L3.im | L4 pl | L4.im | nhr pl | nhr.im | Larval pl |
|----------------|-------|-------|-------|-------|--------|--------|-----------|
| L3 pool        | 1.00  | 0.93  | 0.81  | 0.66  | 0.72   | 0.63   | 0.27      |
| L3.indiv mean  | 0.93  | 1.00  | 0.67  | 0.74  | 0.67   | 0.72   | 0.20      |
| L3.indiv1      | 0.53  | 0.65  | 0.41  | 0.39  | 0.32   | 0.37   | 0.11      |
| L3.indiv2      | 0.78  | 0.80  | 0.57  | 0.66  | 0.53   | 0.55   | 0.17      |
| L3.indiv3      | 0.82  | 0.78  | 0.59  | 0.59  | 0.71   | 0.70   | 0.25      |
| L3.indiv4      | 0.77  | 0.79  | 0.58  | 0.66  | 0.68   | 0.67   | 0.18      |
| L3.indiv5      | 0.59  | 0.72  | 0.39  | 0.50  | 0.35   | 0.42   | 0.06      |
|                |       |       |       |       |        |        |           |
| L4 pool        | 0.81  | 0.67  | 1.00  | 0.56  | 0.68   | 0.48   | 0.35      |
| L4.indiv mean  | 0.66  | 0.74  | 0.56  | 1.00  | 0.56   | 0.67   | 0.15      |
| L4.indiv1      | 0.71  | 0.77  | 0.66  | 0.74  | 0.55   | 0.58   | 0.14      |
| L4.indiv2      | 0.70  | 0.75  | 0.59  | 0.79  | 0.58   | 0.65   | 0.12      |
| L4.indiv3      | 0.16  | 0.18  | 0.10  | 0.51  | 0.11   | 0.15   | 0.02      |
| L4.indiv4      | 0.46  | 0.54  | 0.46  | 0.66  | 0.37   | 0.47   | 0.09      |
| L4.indiv5      | 0.43  | 0.46  | 0.37  | 0.55  | 0.46   | 0.57   | 0.18      |
|                |       |       |       |       |        |        |           |
| nhr pool       | 0.72  | 0.67  | 0.68  | 0.56  | 1.00   | 0.78   | 0.33      |
| nhr.indiv mean | 0.63  | 0.72  | 0.48  | 0.67  | 0.78   | 1.00   | 0.17      |
| nhr.indiv1     | 0.25  | 0.35  | 0.20  | 0.29  | 0.28   | 0.53   | 0.05      |
| nhr.indiv2     | 0.73  | 0.76  | 0.61  | 0.71  | 0.72   | 0.75   | 0.17      |
| nhr.indiv3     | 0.49  | 0.60  | 0.37  | 0.53  | 0.53   | 0.62   | 0.10      |
| nhr.indiv4     | 0.40  | 0.41  | 0.27  | 0.42  | 0.54   | 0.71   | 0.13      |
| nhr.indiv5     | 0.27  | 0.31  | 0.19  | 0.31  | 0.49   | 0.60   | 0.11      |

**Table S6 (continued). Correlation of Measured Gene Expression Levels Between Cells and Pools.**

**S6B.** The correlations ( $r^2$ ) of gene expression levels in individual LCs versus one another. These comparisons used all 10,064 genes observed in either pooled or individual wild-type L3- or L4-stage LCs. Correlations of individual cells to one another are lower than to their mean, but higher than to whole larvae.

|            |           |           |           |           |           |
|------------|-----------|-----------|-----------|-----------|-----------|
|            | L3.indiv1 | L3.indiv2 | L3.indiv3 | L3.indiv4 | L3.indiv5 |
| L3.indiv1  | 1.00      | 0.44      | 0.32      | 0.30      | 0.47      |
| L3.indiv2  | 0.44      | 1.00      | 0.60      | 0.60      | 0.48      |
| L3.indiv3  | 0.32      | 0.60      | 1.00      | 0.73      | 0.38      |
| L3.indiv4  | 0.30      | 0.60      | 0.73      | 1.00      | 0.44      |
| L3.indiv5  | 0.47      | 0.48      | 0.38      | 0.44      | 1.00      |
|            |           |           |           |           |           |
| L4.indiv1  | 0.57      | 0.72      | 0.49      | 0.58      | 0.55      |
| L4.indiv2  | 0.42      | 0.72      | 0.55      | 0.61      | 0.52      |
| L4.indiv3  | 0.08      | 0.18      | 0.14      | 0.19      | 0.12      |
| L4.indiv4  | 0.31      | 0.59      | 0.38      | 0.42      | 0.37      |
| L4.indiv5  | 0.18      | 0.31      | 0.52      | 0.49      | 0.29      |
|            |           |           |           |           |           |
| nhr.indiv1 | 0.34      | 0.20      | 0.24      | 0.23      | 0.30      |
| nhr.indiv2 | 0.41      | 0.67      | 0.63      | 0.69      | 0.49      |
| nhr.indiv3 | 0.38      | 0.56      | 0.39      | 0.46      | 0.48      |
| nhr.indiv4 | 0.12      | 0.29      | 0.61      | 0.51      | 0.14      |
| nhr.indiv5 | 0.12      | 0.20      | 0.37      | 0.32      | 0.17      |
|            |           |           |           |           |           |
|            | L4.indiv1 | L4.indiv2 | L4.indiv3 | L4.indiv4 | L4.indiv5 |
| L3.indiv1  | 0.57      | 0.42      | 0.08      | 0.31      | 0.18      |
| L3.indiv2  | 0.72      | 0.72      | 0.18      | 0.59      | 0.31      |
| L3.indiv3  | 0.49      | 0.55      | 0.14      | 0.38      | 0.52      |
| L3.indiv4  | 0.58      | 0.61      | 0.19      | 0.42      | 0.49      |
| L3.indiv5  | 0.55      | 0.52      | 0.12      | 0.37      | 0.29      |
|            |           |           |           |           |           |
| L4.indiv1  | 1.00      | 0.80      | 0.17      | 0.68      | 0.30      |
| L4.indiv2  | 0.80      | 1.00      | 0.25      | 0.58      | 0.34      |
| L4.indiv3  | 0.17      | 0.25      | 1.00      | 0.14      | 0.08      |
| L4.indiv4  | 0.68      | 0.58      | 0.14      | 1.00      | 0.31      |
| L4.indiv5  | 0.30      | 0.34      | 0.08      | 0.31      | 1.00      |
|            |           |           |           |           |           |
| nhr.indiv1 | 0.32      | 0.28      | 0.04      | 0.23      | 0.25      |
| nhr.indiv2 | 0.75      | 0.79      | 0.19      | 0.53      | 0.38      |
| nhr.indiv3 | 0.61      | 0.59      | 0.13      | 0.45      | 0.27      |
| nhr.indiv4 | 0.25      | 0.37      | 0.09      | 0.23      | 0.50      |
| nhr.indiv5 | 0.18      | 0.23      | 0.08      | 0.19      | 0.38      |



|            | nhr.indiv1 | nhr.indiv2 | nhr.indiv3 | nhr.indiv4 | nhr.indiv5 |
|------------|------------|------------|------------|------------|------------|
| L3.indiv1  | 0.34       | 0.41       | 0.38       | 0.12       | 0.12       |
| L3.indiv2  | 0.20       | 0.67       | 0.56       | 0.29       | 0.20       |
| L3.indiv3  | 0.24       | 0.63       | 0.39       | 0.61       | 0.37       |
| L3.indiv4  | 0.23       | 0.69       | 0.46       | 0.51       | 0.32       |
| L3.indiv5  | 0.30       | 0.49       | 0.48       | 0.14       | 0.17       |
|            |            |            |            |            |            |
| L4.indiv1  | 0.32       | 0.75       | 0.61       | 0.25       | 0.18       |
| L4.indiv2  | 0.28       | 0.79       | 0.59       | 0.37       | 0.23       |
| L4.indiv3  | 0.04       | 0.19       | 0.13       | 0.09       | 0.08       |
| L4.indiv4  | 0.23       | 0.53       | 0.45       | 0.23       | 0.19       |
| L4.indiv5  | 0.25       | 0.38       | 0.27       | 0.50       | 0.38       |
|            |            |            |            |            |            |
| nhr.indiv1 | 1.00       | 0.29       | 0.39       | 0.16       | 0.21       |
| nhr.indiv2 | 0.29       | 1.00       | 0.62       | 0.44       | 0.27       |
| nhr.indiv3 | 0.39       | 0.62       | 1.00       | 0.21       | 0.19       |
| nhr.indiv4 | 0.16       | 0.44       | 0.21       | 1.00       | 0.45       |
| nhr.indiv5 | 0.21       | 0.27       | 0.19       | 0.45       | 1.00       |

**Table S6 (continued). Correlation of Measured Gene Expression Levels Between Cells and Pools.**

**S6C.** The correlations ( $r^2$ ) of gene expression levels in individual LCs to the mean of the other four cells of their type ("Mean4"), which provides a measurement of biological rather than technical reproducibility. These comparisons used all 10,064 genes observed in either pooled or individual wild-type L3- or L4-stage LCs. Correlation of individual LCs to our background control of whole larval RNA was substantially lower.

|            | Mean4 | Larval pool |
|------------|-------|-------------|
| L3.indiv1  | 0.48  | 0.11        |
| L3.indiv2  | 0.71  | 0.17        |
| L3.indiv3  | 0.65  | 0.25        |
| L3.indiv4  | 0.67  | 0.18        |
| L3.indiv5  | 0.57  | 0.06        |
|            |       |             |
| L4.indiv1  | 0.62  | 0.14        |
| L4.indiv2  | 0.68  | 0.12        |
| L4.indiv3  | 0.19  | 0.02        |
| L4.indiv4  | 0.55  | 0.09        |
| L4.indiv5  | 0.30  | 0.18        |
|            |       |             |
| nhr.indiv1 | 0.34  | 0.05        |
| nhr.indiv2 | 0.61  | 0.17        |
| nhr.indiv3 | 0.48  | 0.10        |
| nhr.indiv4 | 0.45  | 0.13        |
| nhr.indiv5 | 0.43  | 0.11        |

**Table S7. The Full Set of GO Terms Overrepresented Among Each of Five k-partitioned Gene Clusters Shown in Fig. 2A.**

|                                                                             |                                                                          |                |                |
|-----------------------------------------------------------------------------|--------------------------------------------------------------------------|----------------|----------------|
| <b>Cluster 1:</b><br>NHR-67-inhibited,<br>broad expression<br>(2,233 genes) |                                                                          |                |                |
| <b>root_node_name</b>                                                       | <b>node_name</b>                                                         | <b>node_id</b> | <b>p-value</b> |
| molecular_function                                                          | protein dimerization activity                                            | GO:0046983     | 0.000699563    |
| cellular_component                                                          | mitochondrion                                                            | GO:0005739     | 0.000247493    |
| cellular_component                                                          | organelle envelope                                                       | GO:0031967     | 7.83E-05       |
| biological_process                                                          | ameboidal cell migration                                                 | GO:0001667     | 0.000667211    |
| biological_process                                                          | receptor-mediated endocytosis                                            | GO:0006898     | 9.20E-05       |
| biological_process                                                          | multicellular organismal development                                     | GO:0007275     | 0.000719621    |
| biological_process                                                          | axon guidance                                                            | GO:0007411     | 0.000340993    |
| biological_process                                                          | tissue development                                                       | GO:0009888     | 0.000854911    |
| biological_process                                                          | gonad morphogenesis                                                      | GO:0035262     | 0.000683918    |
| biological_process                                                          | positive regulation of growth rate                                       | GO:0040010     | 0.000135525    |
| biological_process                                                          | regulation of transport                                                  | GO:0051049     | 0.000667211    |
| biological_process                                                          | establishment of localization in cell                                    | GO:0051649     | 0.000187531    |
| biological_process                                                          | cellular response to biotic stimulus                                     | GO:0071216     | 0.000575511    |
| biological_process                                                          | cellular response to protein stimulus                                    | GO:0071445     | 0.000575511    |
|                                                                             |                                                                          |                |                |
| <b>Cluster 2:</b><br>NHR-67-activated,<br>broad expression<br>(1,013 genes) |                                                                          |                |                |
| <b>root_node_name</b>                                                       | <b>node_name</b>                                                         | <b>node_id</b> | <b>p-value</b> |
| biological_process                                                          | cellular amino acid catabolic process                                    | GO:0009063     | 0.000700349    |
| biological_process                                                          | water-soluble vitamin biosynthetic process                               | GO:0042364     | 0.000148556    |
|                                                                             |                                                                          |                |                |
| <b>Cluster 3:</b><br>Ubiquitous<br>(1,164 genes)                            |                                                                          |                |                |
| <b>root_node_name</b>                                                       | <b>node_name</b>                                                         | <b>node_id</b> | <b>p-value</b> |
| molecular_function                                                          | structural constituent of ribosome                                       | GO:0003735     | 3.43E-36       |
| molecular_function                                                          | translation elongation factor activity                                   | GO:0003746     | 2.02E-05       |
| molecular_function                                                          | cytochrome-c oxidase activity                                            | GO:0004129     | 6.67E-06       |
| molecular_function                                                          | threonine-type endopeptidase activity                                    | GO:0004298     | 2.39E-11       |
| molecular_function                                                          | GTP binding                                                              | GO:0005525     | 0.000164665    |
| molecular_function                                                          | sugar binding                                                            | GO:0005529     | 0.000130867    |
| molecular_function                                                          | NADH dehydrogenase (ubiquinone) activity                                 | GO:0008137     | 2.02E-05       |
| molecular_function                                                          | hydrogen ion transmembrane transporter activity                          | GO:0015078     | 2.61E-06       |
| molecular_function                                                          | rRNA binding                                                             | GO:0019843     | 0.000165167    |
| molecular_function                                                          | ribosome binding                                                         | GO:0043022     | 0.000944749    |
| molecular_function                                                          | hydrogen ion transporting ATP synthase activity,<br>rotational mechanism | GO:0046933     | 0.000488813    |
| molecular_function                                                          | proton-transporting ATPase activity, rotational                          | GO:0046961     | 3.38E-05       |

|                                                   |                                                                 |                |                |
|---------------------------------------------------|-----------------------------------------------------------------|----------------|----------------|
|                                                   | mechanism                                                       |                |                |
| molecular_function                                | unfolded protein binding                                        | GO:0051082     | 4.90E-06       |
| cellular_component                                | mitochondrion                                                   | GO:0005739     | 1.73E-05       |
| cellular_component                                | proteasome core complex                                         | GO:0005839     | 4.32E-06       |
| cellular_component                                | ribosome                                                        | GO:0005840     | 7.06E-33       |
| cellular_component                                | striated muscle thin filament                                   | GO:0005865     | 0.000151494    |
| cellular_component                                | small ribosomal subunit                                         | GO:0015935     | 7.44E-05       |
| cellular_component                                | prefoldin complex                                               | GO:0016272     | 0.000151494    |
| cellular_component                                | vacuolar proton-transporting V-type ATPase complex              | GO:0016471     | 0.000320163    |
| cellular_component                                | proteasome core complex, alpha-subunit complex                  | GO:0019773     | 4.32E-06       |
| cellular_component                                | organelle membrane                                              | GO:0031090     | 0.000723281    |
| cellular_component                                | proton-transporting two-sector ATPase complex, catalytic domain | GO:0033178     | 1.63E-05       |
| cellular_component                                | cytoplasmic part                                                | GO:0044444     | 6.22E-05       |
| cellular_component                                | proton-transporting ATP synthase complex, coupling factor F(o)  | GO:0045263     | 0.000517661    |
| biological_process                                | reproduction                                                    | GO:0000003     | 3.82E-20       |
| biological_process                                | nematode larval development                                     | GO:0002119     | 2.42E-37       |
| biological_process                                | translation                                                     | GO:0006412     | 1.45E-26       |
| biological_process                                | translational elongation                                        | GO:0006414     | 4.56E-10       |
| biological_process                                | protein folding                                                 | GO:0006457     | 1.59E-05       |
| biological_process                                | receptor-mediated endocytosis                                   | GO:0006898     | 4.28E-05       |
| biological_process                                | determination of adult lifespan                                 | GO:0008340     | 3.65E-15       |
| biological_process                                | embryo development ending in birth or egg hatching              | GO:0009792     | 3.23E-45       |
| biological_process                                | body morphogenesis                                              | GO:0010171     | 1.42E-05       |
| biological_process                                | ATP synthesis coupled proton transport                          | GO:0015986     | 5.81E-10       |
| biological_process                                | molting cycle, collagen and cuticulin-based cuticle             | GO:0018996     | 1.56E-06       |
| biological_process                                | electron transport chain                                        | GO:0022900     | 0.000669231    |
| biological_process                                | pronuclear migration                                            | GO:0035046     | 2.45E-05       |
| biological_process                                | growth                                                          | GO:0040007     | 9.91E-15       |
| biological_process                                | positive regulation of growth rate                              | GO:0040010     | 1.70E-13       |
| biological_process                                | locomotion                                                      | GO:0040011     | 1.69E-08       |
| biological_process                                | regulation of multicellular organism growth                     | GO:0040014     | 0.000301983    |
| biological_process                                | hermaphrodite genitalia development                             | GO:0040035     | 3.39E-07       |
| biological_process                                | cellular respiration                                            | GO:0045333     | 7.00E-05       |
| biological_process                                | negative regulation of growth                                   | GO:0045926     | 0.00081114     |
| biological_process                                | protein polymerization                                          | GO:0051258     | 1.27E-05       |
| biological_process                                | proteolysis involved in cellular protein catabolic process      | GO:0051603     | 0.000106085    |
|                                                   |                                                                 |                |                |
|                                                   |                                                                 |                |                |
| <b>Cluster 4:</b><br>L3-specific<br>(1,400 genes) |                                                                 |                |                |
| <b>root_node_name</b>                             | <b>node_name</b>                                                | <b>node_id</b> | <b>p-value</b> |
| molecular_function                                | sequence-specific DNA binding transcription factor activity     | GO:0003700     | 0.000538886    |
| molecular_function                                | monooxygenase activity                                          | GO:0004497     | 0.000114898    |

|                                                                        |                                                      |                |                |
|------------------------------------------------------------------------|------------------------------------------------------|----------------|----------------|
| molecular_function                                                     | heme binding                                         | GO:0020037     | 0.000539324    |
| molecular_function                                                     | sequence-specific DNA binding                        | GO:0043565     | 9.07E-05       |
| cellular_component                                                     | nucleosome                                           | GO:0000786     | 1.37E-07       |
| biological_process                                                     | nucleosome assembly                                  | GO:0006334     | 7.07E-07       |
| biological_process                                                     | RNA biosynthetic process                             | GO:0032774     | 0.000822246    |
| biological_process                                                     | ncRNA processing                                     | GO:0034470     | 0.00057598     |
| biological_process                                                     | kinetochore organization                             | GO:0051383     | 0.000788237    |
|                                                                        |                                                      |                |                |
| <b>Cluster 5:</b><br>NHR-67-activated,<br>L4-specific<br>(2,201 genes) |                                                      |                |                |
| <b>root_node_name</b>                                                  | <b>node_name</b>                                     | <b>node_id</b> | <b>p-value</b> |
| molecular_function                                                     | protein serine/threonine kinase activity             | GO:0004674     | 2.40E-10       |
| molecular_function                                                     | protein tyrosine kinase activity                     | GO:0004713     | 4.07E-08       |
| molecular_function                                                     | protein tyrosine phosphatase activity                | GO:0004725     | 4.73E-06       |
| molecular_function                                                     | cation channel activity                              | GO:0005261     | 0.000785088    |
| molecular_function                                                     | potassium channel activity                           | GO:0005267     | 5.72E-05       |
| molecular_function                                                     | gated channel activity                               | GO:0022836     | 9.15E-05       |
| cellular_component                                                     | integral to membrane                                 | GO:0016021     | 2.62E-24       |
| biological_process                                                     | protein phosphorylation                              | GO:0006468     | 3.85E-11       |
| biological_process                                                     | protein dephosphorylation                            | GO:0006470     | 4.84E-06       |
| biological_process                                                     | G-protein coupled receptor protein signaling pathway | GO:0007186     | 0.000147227    |
| biological_process                                                     | metal ion transport                                  | GO:0030001     | 0.00041068     |
| biological_process                                                     | lipid glycosylation                                  | GO:0030259     | 0.000541829    |

**Table S8. Genes Selected for RNAi and Scored for LC Migration Defects.** Results are listed as either "nonwt\_RNAi" or "WT\_RNAi", for genes that did or did not show a phenotype.

| Gene                           | RNAi_screen |
|--------------------------------|-------------|
| WBGene00020142 T01C8.1 aak-2   | WT_RNAi     |
| WBGene00017967 F32A5.1 ada-2   | WT_RNAi     |
| WBGene00000074 C04A11.4 adm-2  | WT_RNAi     |
| WBGene00000205 M01B12.3 arx-7  | nonwt_RNAi  |
| WBGene00000219 F21F8.7 asp-6   | WT_RNAi     |
| WBGene00000221 T04C10.4 atf-5  | WT_RNAi     |
| WBGene00015096 B0261.8         | WT_RNAi     |
| WBGene00009945 F52H3.3 bath-38 | WT_RNAi     |
| WBGene00007237 C01G10.10       | WT_RNAi     |
| WBGene00015361 C02H6.1         | WT_RNAi     |
| WBGene00015510 C06A6.5         | WT_RNAi     |
| WBGene00007496 C09G9.7 npax-4  | WT_RNAi     |
| WBGene00015815 C16A11.2        | WT_RNAi     |
| WBGene00016046 C24B5.4         | WT_RNAi     |
| WBGene00016162 C27D6.4 crh-2   | nonwt_RNAi  |
| WBGene00007941 C34F6.7         | WT_RNAi     |
| WBGene00016439 C35D10.1        | WT_RNAi     |
| WBGene00007994 C37E2.2         | WT_RNAi     |
| WBGene00008065 C43C3.2 npr-18  | WT_RNAi     |
| WBGene00016749 C48E7.1         | WT_RNAi     |
| WBGene00008260 C52G5.2         | WT_RNAi     |
| WBGene00016922 C54F6.4         | WT_RNAi     |
| WBGene00000437 R13A5.5 ceh-13  | WT_RNAi     |
| WBGene00000462 T26C11.5 ceh-41 | WT_RNAi     |
| WBGene00011122 R07H5.2 cpt-2   | WT_RNAi     |
| WBGene00017028 D1044.2         | WT_RNAi     |
| WBGene00008366 D1046.5 tpa-1   | nonwt_RNAi  |
| WBGene00000908 F11A1.3 daf-12  | nonwt_RNAi  |
| WBGene00000914 F33H1.1 daf-19  | WT_RNAi     |
| WBGene00017381 F11D5.3 ddr-2   | WT_RNAi     |
| WBGene00012116 T28B8.5 del-4   | WT_RNAi     |
| WBGene00000959 F46H6.2 dkg-2   | WT_RNAi     |
| WBGene00000961 T21B6.1 dgn-1   | WT_RNAi     |
| WBGene00018943 F56C3.6 dgn-2   | WT_RNAi     |
| WBGene00008438 DH11.5          | nonwt_RNAi  |
| WBGene00012832 Y43F8C.10 dmd-3 | WT_RNAi     |
| WBGene00010484 K01H12.1 dph-3  | WT_RNAi     |
| WBGene00001078 F22B7.10 dpy-19 | WT_RNAi     |
| WBGene00001086 R13G10.1 dpy-27 | WT_RNAi     |
| WBGene00001131 F15D3.1 dys-1   | WT_RNAi     |
| WBGene00008483 E04D5.4         | WT_RNAi     |

|                                  |            |
|----------------------------------|------------|
| WBGene00001148 H30A04.1 eat-20   | WT_RNAi    |
| WBGene00001186 F55A8.1 egl-18    | WT_RNAi    |
| WBGene00001196 M01D7.7 egl-30    | WT_RNAi    |
| WBGene00001173 F55A8.2 egl-4     | WT_RNAi    |
| WBGene00001210 K11G9.4 egl-46    | WT_RNAi    |
| WBGene00001174 C08C3.1 egl-5     | nonwt_RNAi |
| WBGene00007772 C27C12.2 egrh-1   | WT_RNAi    |
| WBGene00001253 F52C12.5 elt-6    | WT_RNAi    |
| WBGene00001309 M01D7.6 emr-1     | WT_RNAi    |
| WBGene00008564 F08A8.1 acox-1    | WT_RNAi    |
| WBGene00017265 F08F3.9           | WT_RNAi    |
| WBGene00008621 F09C8.1           | WT_RNAi    |
| WBGene00017317 F09G2.9           | WT_RNAi    |
| WBGene00017501 F15E11.15         | nonwt_RNAi |
| WBGene00017534 F17A9.2           | WT_RNAi    |
| WBGene00017535 F17A9.3           | WT_RNAi    |
| WBGene00008951 F19C6.2           | WT_RNAi    |
| WBGene00017950 F31E3.2           | WT_RNAi    |
| WBGene00009306 F32A7.5           | WT_RNAi    |
| WBGene00018378 F43C11.1          | WT_RNAi    |
| WBGene00009688 F44E5.1           | WT_RNAi    |
| WBGene00018623 F48G7.12          | WT_RNAi    |
| WBGene00009888 F49E2.5           | WT_RNAi    |
| WBGene00018928 F56B3.2           | WT_RNAi    |
| WBGene00016138 C26E6.2 flh-2     | WT_RNAi    |
| WBGene00001449 F07D3.2 flp-6     | WT_RNAi    |
| WBGene00010453 K01B6.1 fozi-1    | WT_RNAi    |
| WBGene00014177 ZK1010.3 frg-1    | WT_RNAi    |
| WBGene00001519 Y40H4A.1 gar-3    | WT_RNAi    |
| WBGene00021697 Y48G9A.3 gcn-1    | WT_RNAi    |
| WBGene00001570 F58A4.11 gei-13   | nonwt_RNAi |
| WBGene00001580 F28D1.10 gex-3    | WT_RNAi    |
| WBGene00021980 Y58A7A.6 glb-32   | nonwt_RNAi |
| WBGene00001636 Y75B8A.9 gly-11   | WT_RNAi    |
| WBGene00010593 K06A4.3 gsnl-1    | WT_RNAi    |
| WBGene00001753 R03D7.6 gst-5     | WT_RNAi    |
| WBGene00010416 H25P06.1          | WT_RNAi    |
| WBGene00006452 R148.6 heh-1      | WT_RNAi    |
| WBGene00001860 F28B3.7 him-1     | nonwt_RNAi |
| WBGene00009002 F21C3.3 hint-1    | WT_RNAi    |
| WBGene00001957 F48D6.3 hlh-13    | WT_RNAi    |
| WBGene00001962 F57C12.3 hlh-19   | nonwt_RNAi |
| WBGene00001949 M05B5.5 hlh-2     | nonwt_RNAi |
| WBGene00001953 C02B8.4 hlh-8     | nonwt_RNAi |
| WBGene00001995 K08H2.6 hpl-1     | WT_RNAi    |
| WBGene00002012 F38E11.1 hsp-12.3 | nonwt_RNAi |

|                                  |            |
|----------------------------------|------------|
| WBGene00002026 C12C8.1 hsp-70    | WT_RNAi    |
| WBGene00002071 T04G9.3 ile-2     | WT_RNAi    |
| WBGene00019030 F58B6.2 inft-1    | nonwt_RNAi |
| WBGene00002101 T28B8.2 ins-18    | WT_RNAi    |
| WBGene00002175 Y105C5B.21 jac-1  | WT_RNAi    |
| WBGene00019344 K02G10.1          | WT_RNAi    |
| WBGene00010704 K09A11.1          | WT_RNAi    |
| WBGene00019609 K10B3.1           | WT_RNAi    |
| WBGene00010767 K11B4.2           | WT_RNAi    |
| WBGene00019673 K12C11.1          | WT_RNAi    |
| WBGene00002216 T09A5.2 klp-3     | WT_RNAi    |
| WBGene00002267 C44F1.3 lec-4     | WT_RNAi    |
| WBGene00020605 T20B12.9 lgc-50   | WT_RNAi    |
| WBGene00010716 K09C8.4 lge-1     | WT_RNAi    |
| WBGene00006407 F25H5.1 lim-9     | nonwt_RNAi |
| WBGene00003015 W03C9.4 lin-29    | nonwt_RNAi |
| WBGene00003089 K02C4.4 ltd-1     | WT_RNAi    |
| WBGene00019737 M02F4.3           | WT_RNAi    |
| WBGene00019751 M03D4.4           | WT_RNAi    |
| WBGene00003235 C52E4.2 mif-2     | WT_RNAi    |
| WBGene00003238 Y34D9B.1 mig-1    | WT_RNAi    |
| WBGene00003367 M106.1 mix-1      | nonwt_RNAi |
| WBGene00003426 F36H12.7 msp-19   | nonwt_RNAi |
| WBGene00003424 F26G1.7 msp-3     | nonwt_RNAi |
| WBGene00003435 C33F10.9 msp-40   | nonwt_RNAi |
| WBGene00003438 F58A6.8 msp-45    | nonwt_RNAi |
| WBGene00003442 C34F11.6 msp-49   | nonwt_RNAi |
| WBGene00021839 Y54E10BL.5 nduf-5 | WT_RNAi    |
| WBGene00017742 F23F1.1 nfyc-1    | WT_RNAi    |
| WBGene00003696 T01G6.4 nhr-106   | WT_RNAi    |
| WBGene00003700 Y46H3D.5 nhr-110  | WT_RNAi    |
| WBGene00003718 F44C8.5 nhr-128   | WT_RNAi    |
| WBGene00017510 F16B4.9 nhr-178   | WT_RNAi    |
| WBGene00017367 F10G2.9 nhr-263   | WT_RNAi    |
| WBGene00003661 K11E4.5 nhr-71    | WT_RNAi    |
| WBGene00003684 C12D5.8 nhr-94    | WT_RNAi    |
| WBGene00003687 H27C11.1 nhr-97   | nonwt_RNAi |
| WBGene00003738 F54F3.1 nid-1     | WT_RNAi    |
| WBGene00003779 Y75B8A.2 nob-1    | nonwt_RNAi |
| WBGene00003968 T14F9.4 peb-1     | WT_RNAi    |
| WBGene00004010 Y48A6C.5 pha-1    | nonwt_RNAi |
| WBGene00004024 Y75B8A.1 php-3    | WT_RNAi    |
| WBGene00004032 F57F5.5 pkc-1     | WT_RNAi    |
| WBGene00004076 W09B6.1 pod-2     | WT_RNAi    |
| WBGene00004134 F59B10.1 pqn-47   | WT_RNAi    |
| WBGene00004166 Y43H11AL.3 pqn-85 | nonwt_RNAi |



|                                 |            |
|---------------------------------|------------|
| WBGene00004192 ZK809.7 prx-2    | WT_RNAi    |
| WBGene00004213 C48D5.2 ptp-1    | WT_RNAi    |
| WBGene00004224 F55F8.1 ptr-10   | WT_RNAi    |
| WBGene00004219 C45B2.7 ptr-4    | WT_RNAi    |
| WBGene00004259 D2085.1 pyr-1    | WT_RNAi    |
| WBGene00019842 R02F11.4         | WT_RNAi    |
| WBGene00019867 R04B3.2          | WT_RNAi    |
| WBGene00019904 R05G9.2          | WT_RNAi    |
| WBGene00019945 R08C7.1          | WT_RNAi    |
| WBGene00020125 R173.3           | WT_RNAi    |
| WBGene00016354 C33F10.5 rig-6   | WT_RNAi    |
| WBGene00017183 F02E11.5 scl-15  | WT_RNAi    |
| WBGene00004780 C09B7.1 ser-7    | WT_RNAi    |
| WBGene00004873 Y47D3A.26 smc-3  | nonwt_RNAi |
| WBGene00004874 F35G12.8 smc-4   | nonwt_RNAi |
| WBGene00004921 F31E8.2 snt-1    | WT_RNAi    |
| WBGene00004962 F53G12.6 spe-8   | WT_RNAi    |
| WBGene00007918 C34C6.5 sphk-1   | nonwt_RNAi |
| WBGene00004999 K09F5.3 spp-14   | WT_RNAi    |
| WBGene00005003 F27C8.4 spp-18   | WT_RNAi    |
| WBGene00009743 F45H11.1 sptf-1  | WT_RNAi    |
| WBGene00011926 T22C8.5 sptf-2   | WT_RNAi    |
| WBGene00005113 R186.2 srd-35    | WT_RNAi    |
| WBGene00005517 F28D9.2 sri-5    | WT_RNAi    |
| WBGene00015419 C04E6.2 srsx-18  | nonwt_RNAi |
| WBGene00005719 F53F1.7 srv-8    | WT_RNAi    |
| WBGene00005936 K01B6.2 srx-45   | WT_RNAi    |
| WBGene00044068 ZK867.1 syd-9    | nonwt_RNAi |
| WBGene00011373 T02D1.7          | WT_RNAi    |
| WBGene00011772 T14G8.4          | WT_RNAi    |
| WBGene00011798 T16G1.4          | WT_RNAi    |
| WBGene00011824 T18D3.7          | WT_RNAi    |
| WBGene00020615 T20D4.9          | WT_RNAi    |
| WBGene00020630 T20F7.1          | nonwt_RNAi |
| WBGene00011873 T20G5.12         | WT_RNAi    |
| WBGene00020808 T25F10.6         | WT_RNAi    |
| WBGene00006520 D2013.10 tag-175 | WT_RNAi    |
| WBGene00016423 C34H3.1 tag-275  | WT_RNAi    |
| WBGene00044324 ZK652.3 tag-277  | WT_RNAi    |
| WBGene00016871 C52B11.2 tag-303 | WT_RNAi    |
| WBGene00006562 K01C8.3 tdc-1    | WT_RNAi    |
| WBGene00006498 R13F6.4 ten-1    | nonwt_RNAi |
| WBGene00006575 F13B10.1 tir-1   | WT_RNAi    |
| WBGene00017298 F09E10.8 toca-1  | nonwt_RNAi |
| WBGene00006668 R04F11.4 twk-13  | nonwt_RNAi |
| WBGene00006672 C24A3.6 twk-18   | nonwt_RNAi |

|                                 |            |
|---------------------------------|------------|
| WBGene00006683 Y47D3B.5 twk-31  | WT_RNAi    |
| WBGene00006831 C52E12.2 unc-104 | WT_RNAi    |
| WBGene00006792 T06H11.1 unc-58  | WT_RNAi    |
| WBGene00006804 Y37D8A.13 unc-71 | WT_RNAi    |
| WBGene00006823 C06A5.7 unc-94   | nonwt_RNAi |
| WBGene00006875 T22C8.8 vab-9    | nonwt_RNAi |
| WBGene00012193 W02A11.2 vps-25  | WT_RNAi    |
| WBGene00012162 VZC374L.1        | WT_RNAi    |
| WBGene00020917 W01B11.6         | WT_RNAi    |
| WBGene00012366 W09G3.2 maea-1   | nonwt_RNAi |
| WBGene00012549 Y37D8A.8         | WT_RNAi    |
| WBGene00012658 Y39A1A.21        | WT_RNAi    |
| WBGene00021546 Y43H11AL.2       | WT_RNAi    |
| WBGene00012871 Y45F10B.3        | WT_RNAi    |
| WBGene00012996 Y48C3A.16        | WT_RNAi    |
| WBGene00013042 Y49E10.23 cccp-1 | nonwt_RNAi |
| WBGene00021736 Y50D4A.2 wrb-1   | nonwt_RNAi |
| WBGene00013178 Y53H1A.2         | WT_RNAi    |
| WBGene00013239 Y56A3A.22        | WT_RNAi    |
| WBGene00022280 Y74C10AL.2       | WT_RNAi    |
| WBGene00010178 F57A8.2 yif-1    | WT_RNAi    |
| WBGene00022518 ZC123.3          | nonwt_RNAi |
| WBGene00006975 F54F2.2 zfp-1    | nonwt_RNAi |
| WBGene00018704 F52E4.8 ztf-13   | WT_RNAi    |
| WBGene00006993 Y79H2A.11 zyg-8  | nonwt_RNAi |

**Table S9. Genes With Either RNAi Phenotypes or YFP Transgenes Tested for LC Expression.****S9A. Genes tested with both RNAi and YFP.**

| Gene            | Orthology/description                           |    |   |   | LC exp.  | Spec. | Shape | Path | Delay | Det. | Str. | n= | % abn |
|-----------------|-------------------------------------------------|----|---|---|----------|-------|-------|------|-------|------|------|----|-------|
| <i>hlh-8</i>    | Helix-loop-helix (TWIST) TF                     | TF | D | O | no       | -     | --    |      | -     |      |      | 23 | 35    |
| <i>nob-1</i>    | Homeobox protein abdominal-B                    | TF |   |   | no       |       | -     | ---  | ---   |      |      | 59 | 51    |
| <i>syd-9</i>    | Zinc-finger                                     | TF |   |   | no       | -     | ---   |      | ---   |      |      | 22 | 50    |
| <i>arx-7</i>    | Arp2/3 complex, subunit ARPC5                   |    |   | O | yes      |       | --    | ---  | ---   |      | --   | 62 | 60    |
| <i>gar-3</i>    | Muscarinic acetylcholine receptor               |    |   | O | yes      |       |       |      |       |      |      |    |       |
| <i>him-1</i>    | Cohesin subunit SMC1                            |    | D |   | yes (Ab) |       | ---   |      | ---   | ---  |      | 26 | 69    |
| <i>hsp-12.3</i> | Alpha-crystallin                                |    |   |   | no       |       | ---   |      | ---   |      |      | 25 | 52    |
| <i>ins-18</i>   | Insulin                                         |    |   |   | no       |       |       |      |       |      |      |    |       |
| <i>msp-3</i>    | Major sperm protein (MSP)                       |    |   |   | yes      |       | ---   | -    | ---   |      |      | 28 | 36    |
| <i>pkc-1</i>    | Protein kinase C                                |    | D |   | yes      |       |       |      |       |      |      |    |       |
| R02F11.4        | Centrosomal protein of 97 kDa (CEP97)           |    |   | O | no       |       |       |      |       |      |      |    |       |
| <i>smc-4</i>    | Condensin subunit SMC4                          |    |   | O | yes      |       | ---   |      | ---   | ---  |      | 28 | 82    |
| <i>sphk-1</i>   | Sphingosine kinase                              |    |   | O | yes      |       |       | ---  | --    |      | ---  | 44 | 32    |
| <i>srsx-18</i>  | 7-transmembrane receptor                        |    |   |   | yes      |       |       | -    | ---   |      |      | 79 | 41    |
| <i>srx-45</i>   | 7-transmembrane receptor                        |    |   |   | yes      |       |       |      |       |      |      |    |       |
| T20D4.9         | Nepilysin; peptidase family M13                 |    |   |   | no       |       |       |      |       |      |      |    |       |
| <i>yif-1</i>    | Yip1 interacting factor; cons. membrane protein |    |   | O | yes      |       |       |      |       |      |      |    |       |
| <i>zyg-8</i>    | Doublecortin                                    |    |   |   | no       |       | ---   | -    | --    |      |      | 42 | 45    |

## S9B. Genes tested with RNAi.

| Gene          | Orthology/description                     |    |   |   | LC exp. | Spec. | Shape | Path | Delay | Det. | Str. | n=  | % abn |
|---------------|-------------------------------------------|----|---|---|---------|-------|-------|------|-------|------|------|-----|-------|
| <i>crh-2</i>  | CREB/ATF family transcription factor      | TF |   | O |         |       | -     | --   | ---   |      | --   | 33  | 42    |
| <i>daf-12</i> | Nuclear Hormone Receptor                  | TF | D | O |         |       | ---   |      | ---   |      | ---  | 21  | 48    |
| <i>egl-5</i>  | zerknüllt-like homeobox protein           | TF |   |   |         |       | --    |      | ---   | ---  | ---  | 13  | 69    |
| <i>gei-13</i> | Nondescript; strongly expressed in L3 LCs | TF |   |   |         |       | ---   | ---  | ---   |      |      | 34  | 56    |
| <i>hlh-19</i> | Helix-loop-helix TF                       | TF |   |   |         | --    | -     | --   | ---   |      | -    | 84  | 45    |
| <i>hlh-2</i>  | Helix-loop-helix (E/Da) TF                | TF |   | O |         | ---   |       |      |       |      |      | 11  | 55    |
| <i>lin-29</i> | Zinc finger protein 362                   | TF |   | O |         | ---   | ---   | --   | ---   |      |      | 17  | 94    |
| <i>nhr-97</i> | Nuclear factor 4 hormone receptor         | TF |   |   |         |       | --    | -    | ---   |      |      | 71  | 44    |
| <i>pha-1</i>  | Nematode-specific TF                      | TF |   |   |         |       | ---   | ---  | --    |      |      | 20  | 45    |
| T20F7.1       | Large (738-residue) nematode-specific TF  | TF |   |   |         |       | ---   | ---  | ---   |      |      | 35  | 54    |
| ZC123.3       | Zinc-finger homeodomain protein 2         | TF | D |   |         |       | -     |      | ---   |      | --   | 9   | 56    |
| <i>zfp-1</i>  | PHD finger protein AF10                   | TF | D | O |         |       | --    |      | ---   |      | ---  | 38  | 50    |
| <i>cccp-1</i> | Conserved coiled-coil protein             |    |   |   |         |       | --    |      | ---   | -    |      | 17  | 35    |
| DH11.5        | Nondescript; strongly expressed in L4 LCs |    |   |   |         |       | -     | -    | ---   |      | ---  | 18  | 56    |
| F15E11.15     | BED Zn-finger; strongly expressed in LCs  |    |   |   |         |       |       |      | ---   |      |      | 33  | 36    |
| <i>glb-32</i> | Globin                                    |    |   |   |         | -     | ---   | ---  | ---   | -    | --   | 103 | 43    |
| <i>inft-1</i> | Rho GTPase effector BNI1 and rel. formins |    |   | O |         |       | ---   |      | --    |      |      | 22  | 59    |
| <i>lim-9</i>  | Four and a half lim domains protein       |    |   | O |         |       | --    | ---  | --    |      |      | 52  | 44    |
| <i>maea-1</i> | Macrophage-erythroblast attacher protein  |    |   | O |         | --    | --    | ---  | --    |      |      | 51  | 51    |
| <i>mix-1</i>  | Condensin subunit SMC2                    |    |   | O |         |       | -     |      | ---   |      |      | 11  | 55    |
| <i>msp-19</i> | Major sperm protein (MSP)                 |    |   |   |         |       | -     | -    | ---   |      |      | 13  | 46    |
| <i>msp-40</i> | Major sperm protein (MSP)                 |    |   |   |         |       | --    | -    | ---   |      | -    | 10  | 70    |
| <i>msp-45</i> | Major sperm protein (MSP)                 |    |   |   |         |       | --    |      | -     |      |      | 8   | 25    |
| <i>msp-49</i> | Major sperm protein (MSP)                 |    |   |   |         |       |       |      | ---   |      |      | 10  | 60    |
| <i>pqn-85</i> | SCC2/Nipped-B                             |    | D | O |         | -     | --    | -    | ---   | -    | --   | 82  | 45    |
| <i>smc-3</i>  | Cohesin subunit SMC3                      |    | D | O |         |       | ---   |      | ---   | ---  |      | 12  | 83    |
| <i>ten-1</i>  | Teneurin-1                                |    |   |   |         |       | ---   |      | ---   |      | --   | 24  | 67    |
| <i>toca-1</i> | Cdc42-interacting protein CIP4            |    |   |   |         |       | --    | ---  | ---   |      |      | 62  | 39    |
| <i>tpa-1</i>  | Conserved membrane protein                |    |   | O |         |       | --    | --   | ---   | -    | ---  | 71  | 45    |
| <i>twk-13</i> | Tandem pore domain K <sup>+</sup> channel |    |   |   |         | -     | --    | ---  | ---   |      |      | 21  | 62    |
| <i>twk-18</i> | Tandem pore domain K <sup>+</sup> channel |    |   |   |         |       |       | ---  | -     |      |      | 23  | 39    |
| <i>unc-94</i> | Tropomodulin and leiomodulin              |    |   | O |         |       | --    | --   | ---   |      | --   | 73  | 43    |
| <i>vab-9</i>  | Brain cell membrane protein 1 (BCMP1)     |    |   |   |         | --    | -     | ---  | ---   |      |      | 51  | 31    |
| <i>wrb-1</i>  | Tryptophan-rich basic protein             |    |   |   |         |       | ---   |      | ---   |      |      | 28  | 39    |

**S9C.** Genes tested with YFP.

| Gene          | Orthology/description                 |   |  | LC exp. | Spec. | Shape | Path | Delay | Det. | Str. | n= | % abn |
|---------------|---------------------------------------|---|--|---------|-------|-------|------|-------|------|------|----|-------|
| <i>acr-15</i> | Acetylcholine receptor                |   |  | no      | n.d.  | n.d.  | n.d. | n.d.  | n.d. | n.d. |    |       |
| <i>acr-16</i> | Acetylcholine receptor                |   |  | yes     | n.d.  | n.d.  | n.d. | n.d.  | n.d. | n.d. |    |       |
| <i>glr-1</i>  | AMPA glutamate receptor subunit GluR2 | D |  | no      | n.d.  | n.d.  | n.d. | n.d.  | n.d. | n.d. |    |       |
| <i>glr-2</i>  | AMPA glutamate receptor subunit GluR2 | D |  | yes     | n.d.  | n.d.  | n.d. | n.d.  | n.d. | n.d. |    |       |

"LC exp." denotes genes tested for LC expression with YFP transgenes (except *him-1*, determined with antibodies). "TF" denotes known or predicted transcription factors, "D" denotes human disease orthologs, and "O" denotes strict orthologies to human genes. Phenotypes for RNAi are listed as in Fig. 3. Increasingly severe phenotypes are listed from "-" to "---", with "n/d" for genes not tested with RNAi. "n=" and "% abn." denote the number of animals scored for a gene's RNAi phenotype and the percentage showing at least one phenotype.

**Table S10. Details of Genes Tested for LC Expression by YFP Transgenes.**

| Gene            | LC expr. | Assay          | 5'- forward primer-3' or other source | 5'- (YFP seq) + reverse primer-3' |
|-----------------|----------|----------------|---------------------------------------|-----------------------------------|
| <i>acr-15</i>   | no       | p::YFP         | CG398                                 |                                   |
| <i>acr-16</i>   | yes      | p::YFP         | GCTCAACAACACTACTTTTTTCCT<br>CC        | ACGGACATGAGAATCAGG<br>GAAAGA      |
| <i>arx-7</i>    | yes      | p::YFP         | GATTTTCACCAACCAACCAAC<br>CCA          | TTTTTCCTATCTGAAACAA<br>GAGAT      |
| <i>gar-3</i>    | yes      | p::YFP         | CG308                                 |                                   |
| <i>glr-1</i>    | no       | p::YFP         | KP987                                 |                                   |
| <i>glr-2</i>    | yes      | p::YFP         | CCTGATGATGCTATTGTGTTTT<br>GC          | CGCTACAAAAGCTCCTGA<br>AATTAACC    |
| <i>him-1</i>    | yes      | antibody       |                                       |                                   |
| <i>hlh-8</i>    | no       | p::YFP         | PS5149                                |                                   |
| <i>hsp-12.3</i> | no       | p::YFP         | GTCAACATGTTTACGTGGTTTC<br>TG          | ATCAGAAAATAGTTTCAA<br>AAAGTCCC    |
| <i>ins-18</i>   | no       | p::YFP         | PS5309<br>PS5326                      |                                   |
| <i>msp-3</i>    | yes      | p::YFP         | CACTTCTCAATATACTAACCCCT<br>AC         | GGCGACTTGTTGGAAGAG<br>TGTGAA      |
| <i>nob-1</i>    | no       | p::YFP         | HC183                                 |                                   |
| <i>pkc-1</i>    | yes      | p::YFP         | IK934                                 |                                   |
| <i>R02F11.4</i> | no       | p::YFP         | GCCTTCTTTCATCCACACGCT<br>TT           | AGTGCCTGAAAGAAAATT<br>GCATCA      |
| <i>smc-4</i>    | yes      | p::YFP         | CAAAGCTTCAGCGTCAAAAAA<br>TGA          | CAACCCTAAAATACGTTG<br>ATTTTT      |
| <i>sphk-1</i>   | yes      | p::YFP         | GCTCCAGCAACTTCTACGTTA<br>AGT          | GTGATGTTCCGGTGCAAGT<br>GCACTT     |
| <i>srsx-18</i>  | yes      | p::YFP         | CCACCTTTTTTGGAAGCTGTTT<br>AT          | TGTCTGAAAATATAGATG<br>GTAATG      |
| <i>srx-45</i>   | yes      | p::YFP         | GGAGTAAAGCTAGTGGGGATT<br>TTG          | ATCTTCATTTTTAGTGAGA<br>AAACA      |
| <i>syd-9</i>    | no       | SYD-9::<br>YFP |                                       |                                   |
| <i>T20D4.9</i>  | no       | p::YFP         | GTAGTAGAGCAAACGGAAAA<br>TGGA          | TCTCAGTTAGTATTAAGAA<br>CAAAA      |
| <i>yif-1</i>    | yes      | p::YFP         | GAACAAGTGGATAGGAGTCCT<br>GAG          | CTTCAGCTGAAAATAAAA<br>ATTGGT      |
| <i>zyg-8</i>    | no       | p::YFP         | CTCGAACAACATACTCGGCAA<br>AAT          | CGTTCGAGTAGAGATAGT<br>CTAACA      |

YFPseq is: GAAAAGTTCTTCTCCTTTACTCAT. Strains and their genotypes are listed in Methods.

**Table S11. Gene Functions Preferentially Expressed in Pooled LCs.**

| root_node_name     | node_name                                                   | node_id    | p-value     |
|--------------------|-------------------------------------------------------------|------------|-------------|
| molecular_function | sequence-specific DNA binding transcription factor activity | GO:0003700 | 6.47E-05    |
| molecular_function | receptor activity                                           | GO:0004872 | 0.000634083 |
| molecular_function | protein binding                                             | GO:0005515 | 5.60E-05    |
| molecular_function | cytoskeletal protein binding                                | GO:0008092 | 0.000757682 |
| molecular_function | hydrogen ion transmembrane transporter activity             | GO:0015078 | 0.000365059 |
| molecular_function | sequence-specific DNA binding                               | GO:0043565 | 3.35E-08    |
| molecular_function | metal ion binding                                           | GO:0046872 | 0.000365329 |
| cellular_component | axon                                                        | GO:0030424 | 0.00011527  |
| biological_process | nucleosome assembly                                         | GO:0006334 | 0.000488117 |
| biological_process | regulation of transcription, DNA-dependent                  | GO:0006355 | 0.000103383 |
| biological_process | intracellular protein transport                             | GO:0006886 | 0.0001177   |
| biological_process | cell adhesion                                               | GO:0007155 | 1.11E-05    |
| biological_process | G-protein coupled receptor protein signaling pathway        | GO:0007186 | 0.000129775 |
| biological_process | small GTPase mediated signal transduction                   | GO:0007264 | 0.000246439 |
| biological_process | synaptic transmission, cholinergic                          | GO:0007271 | 0.000837103 |
| biological_process | response to heat                                            | GO:0009408 | 0.000106112 |
| biological_process | regulation of signal transduction                           | GO:0009966 | 0.000299928 |
| biological_process | regulation of cellular component size                       | GO:0032535 | 0.000453619 |
| biological_process | locomotion                                                  | GO:0040011 | 3.61E-05    |
| biological_process | regulation of locomotion                                    | GO:0040012 | 0.000302899 |
| biological_process | regulation of multicellular organism growth                 | GO:0040014 | 0.000153664 |
| biological_process | regulation of pharyngeal pumping                            | GO:0043051 | 0.000348343 |
| biological_process | post-translational protein modification                     | GO:0043687 | 0.000627103 |
| biological_process | regulation of protein metabolic process                     | GO:0051246 | 0.000500838 |
| biological_process | regulation of biological quality                            | GO:0065008 | 0.000456184 |
| biological_process | cellular component assembly at cellular level               | GO:0071844 | 0.000477604 |

This gives the full set of GO terms overrepresented among LC-enriched genes. LC-enriched genes are defined here as those with high ratios of expression in LCs (either L3- or L4-stage, whichever was stronger) to expression in whole larvae.

**Table S12. Gene Functions Upregulated From Pooled L3- to L4-stage LCs in an NHR-67-dependent Manner.**

**S12A.** The full set of GO terms overrepresented among genes with high ratios of expression in pooled L4-stage LCs to expression in pooled L3-stage LCs.

| root_node_name     | node_name                                                           | node_id    | p-value     |
|--------------------|---------------------------------------------------------------------|------------|-------------|
| molecular_function | dopamine beta-monooxygenase activity                                | GO:0004500 | 0.00487488  |
| molecular_function | ribonuclease H activity                                             | GO:0004523 | 0.00408664  |
| molecular_function | protein serine/threonine kinase activity                            | GO:0004674 | 4.61E-05    |
| molecular_function | protein tyrosine kinase activity                                    | GO:0004713 | 0.000453022 |
| molecular_function | protein tyrosine phosphatase activity                               | GO:0004725 | 1.58E-05    |
| molecular_function | structural molecule activity                                        | GO:0005198 | 0.00171799  |
| molecular_function | potassium channel activity                                          | GO:0005267 | 0.000933981 |
| molecular_function | cyclin-dependent protein kinase regulator activity                  | GO:0016538 | 0.00512191  |
| cellular_component | integral to membrane                                                | GO:0016021 | 5.38E-11    |
| cellular_component | contractile fiber part                                              | GO:0044449 | 0.00690771  |
| biological_process | nuclear-transcribed mRNA catabolic process, nonsense-mediated decay | GO:0000184 | 0.00414124  |
| biological_process | protein phosphorylation                                             | GO:0006468 | 8.60E-06    |
| biological_process | protein dephosphorylation                                           | GO:0006470 | 0.000110879 |
| biological_process | methionine metabolic process                                        | GO:0006555 | 0.00620301  |
| biological_process | water-soluble vitamin metabolic process                             | GO:0006767 | 0.00821988  |
| biological_process | regulation of muscle contraction                                    | GO:0006937 | 0.0013925   |
| biological_process | G-protein coupled receptor protein signaling pathway                | GO:0007186 | 0.00713486  |
| biological_process | cellular amino acid catabolic process                               | GO:0009063 | 0.0033618   |
| biological_process | nucleotide biosynthetic process                                     | GO:0009165 | 0.00815794  |
| biological_process | post-embryonic body morphogenesis                                   | GO:0040032 | 0.00195914  |
| biological_process | phosphoinositide-mediated signaling                                 | GO:0048015 | 0.00190175  |



**Table S12 (continued). Gene Functions Upregulated From L3- to L4-stage LCs in an *NHR-67*-dependent Manner.**

**S12B.** The full set of GO terms overrepresented among genes with high ratios of expression in pooled wild-type L4-stage LCs to expression in pooled *nhr-67*(RNAi) L4-stage LCs.

| root_node_name     | node_name                                                           | node_id    | p-value     |
|--------------------|---------------------------------------------------------------------|------------|-------------|
| molecular_function | DNA ligase (ATP) activity                                           | GO:0003910 | 0.00203034  |
| molecular_function | protein serine/threonine kinase activity                            | GO:0004674 | 1.34E-05    |
| molecular_function | protein tyrosine kinase activity                                    | GO:0004713 | 0.000120011 |
| molecular_function | protein tyrosine phosphatase activity                               | GO:0004725 | 0.000308518 |
| molecular_function | nicotinic acetylcholine-activated cation-selective channel activity | GO:0004889 | 0.00777197  |
| molecular_function | structural molecule activity                                        | GO:0005198 | 0.000621201 |
| molecular_function | structural constituent of cytoskeleton                              | GO:0005200 | 0.00550409  |
| molecular_function | cation channel activity                                             | GO:0005261 | 0.00201471  |
| molecular_function | potassium channel activity                                          | GO:0005267 | 0.00153337  |
| molecular_function | calcium ion binding                                                 | GO:0005509 | 0.00100914  |
| molecular_function | protein binding                                                     | GO:0005515 | 0.000519604 |
| molecular_function | voltage-gated cation channel activity                               | GO:0022843 | 0.0047468   |
| molecular_function | neurotransmitter binding                                            | GO:0042165 | 0.00895835  |
| cellular_component | integral to membrane                                                | GO:0016021 | 1.44E-06    |
| cellular_component | sarcomere                                                           | GO:0030017 | 0.00143301  |
| cellular_component | A band                                                              | GO:0031672 | 0.00573005  |
| cellular_component | postsynaptic membrane                                               | GO:0045211 | 0.0067511   |
| cellular_component | striated muscle dense body                                          | GO:0055120 | 0.000416344 |
| biological_process | protein phosphorylation                                             | GO:0006468 | 3.27E-06    |
| biological_process | protein dephosphorylation                                           | GO:0006470 | 7.63E-05    |
| biological_process | glutamine biosynthetic process                                      | GO:0006542 | 0.00958687  |
| biological_process | Mo-molybdopterin cofactor biosynthetic process                      | GO:0006777 | 0.00410362  |
| biological_process | sodium ion transport                                                | GO:0006814 | 0.00857127  |
| biological_process | regulation of muscle contraction                                    | GO:0006937 | 0.00182022  |
| biological_process | homophilic cell adhesion                                            | GO:0007156 | 0.00451715  |
| biological_process | signal transduction                                                 | GO:0007165 | 0.00314681  |
| biological_process | G-protein coupled receptor protein signaling pathway                | GO:0007186 | 0.00468049  |
| biological_process | vitelline membrane formation                                        | GO:0030704 | 0.00975122  |
| biological_process | directional locomotion                                              | GO:0033058 | 0.00914112  |
| biological_process | positive regulation of locomotion                                   | GO:0040017 | 0.00337218  |
| biological_process | negative regulation of cell cycle                                   | GO:0045786 | 0.00805532  |
| biological_process | positive regulation of smooth muscle contraction                    | GO:0045987 | 0.00403835  |
| biological_process | regulation of behavior                                              | GO:0050795 | 0.00665497  |

**Table S12 (continued). Gene Functions Upregulated From L3- to L4-stage LCs in an NHR-67-dependent Manner.**

**S12C.** The overlap of GO terms from Tables S12A and S12B, representing genes upregulated from pooled L3- to L4-stage LCs in an NHR-67-dependent manner. The largest (least significant) p-value from Tables S12A-S12B is shown for each term.

| root_node_name     | node_name                                            | node_id    | p-value     |
|--------------------|------------------------------------------------------|------------|-------------|
| biological_process | G-protein coupled receptor protein signaling pathway | GO:0007186 | 0.00713486  |
| biological_process | protein dephosphorylation                            | GO:0006470 | 0.000110879 |
| biological_process | protein phosphorylation                              | GO:0006468 | 8.60E-06    |
| biological_process | regulation of muscle contraction                     | GO:0006937 | 0.00182022  |
| cellular_component | integral to membrane                                 | GO:0016021 | 1.44E-06    |
| molecular_function | potassium channel activity                           | GO:0005267 | 0.00153337  |
| molecular_function | protein serine/threonine kinase activity             | GO:0004674 | 4.61E-05    |
| molecular_function | protein tyrosine kinase activity                     | GO:0004713 | 0.000453022 |
| molecular_function | protein tyrosine phosphatase activity                | GO:0004725 | 0.000308518 |
| molecular_function | structural molecule activity                         | GO:0005198 | 0.00171799  |

**Table S13. Overrepresentation of Sperm Genes Among LC Genes With High Wild-Type L4/L3 Expression Ratios Versus *nhr-67*(RNAi) L4/L3 Ratios.**

| Genes          |              | L4/L3 expression ranking |         | <i>nhr-67</i> /L3 expression ranking |         |
|----------------|--------------|--------------------------|---------|--------------------------------------|---------|
| Class of genes | No. of genes | p-value                  | z-score | p-value                              | z-score |
| Sperm          | 389          | <10 <sup>-6</sup>        | 22      | <10 <sup>-6</sup>                    | 5.9     |
| Shared sperm   | 328          | <10 <sup>-6</sup>        | 21      | <10 <sup>-6</sup>                    | 6.2     |
| Male sperm     | 24           | 1.2·10 <sup>-5</sup>     | 4.4     | 0.94                                 | 0.1     |
| Herm. sperm    | 37           | 7.3·10 <sup>-5</sup>     | 4.0     | 0.67                                 | 0.4     |
| Sperm/MSP      | 44           | <10 <sup>-6</sup>        | 11      | <10 <sup>-6</sup>                    | 6.2     |
| Sperm/non-MSP  | 345          | <10 <sup>-6</sup>        | 20      | 7.6·10 <sup>-5</sup>                 | 4.0     |
| MSP/non-sperm  | 15           | 1.1·10 <sup>-2</sup>     | 2.6     | 0.32                                 | 1.0     |
| LC-enriched    | 1,097        | 0.74                     | 0.3     | <10 <sup>-6</sup>                    | -5.7    |
| Housekeeping   | 1,164        | <10 <sup>-6</sup>        | -9.0    | <10 <sup>-6</sup>                    | 7.0     |

The 8,011 genes detected in wild-type pooled LCs were ranked by ratios of their observed gene activity, for either wild-type L4-stage to wild-type L3-stage LCs or *nhr-67*(RNAi) L4-stage to wild-type L3-stage LCs. Subsets of the pooled LC genes were then selected by various criteria and given a Wilcoxon rank-sum test to see if they were overrepresented among either high-ranking or low-ranking genes by either the L4/L3 or the *nhr-67*/L3 ranking. The degree of their bias was assayed by their z-score (obtained by the normal approximation in the Wilcoxon test). Genes with positive z-scores are skewed towards higher ranks; negative z-scores, the reverse. The subsets given here include: all of the LC genes which were previously observed to have sperm-enriched expression by Reinke et al. (24); the subset of those genes which were enriched in both male and hermaphrodite sperm ("Shared sperm"); the subset enriched in male sperm; the subset enriched in hermaphrodite sperm; subdivisions of the sperm-expressed LC genes shown in Figure S2 ("sperm/MSP", "sperm/non-MSP", and "MSP/non-sperm"), "LC-enriched" (defined as in Figure 2), and "Housekeeping" (defined as in Figure 2). Generally speaking, sperm-associated genes are more upregulated than expected by chance from L3- to wild-type L4-stage LCs, but much less strongly so from L3- to *nhr-67*(RNAi) L4-stage LCs. That this is not a universal pattern is shown by the rank distributions of LC-enriched genes (which show no bias for L4/L3, while being sharply downranked in *nhr-67*/L3) and of housekeeping genes (which have lower ranks than expected randomly in L4/L3, but higher ranks than expected in *nhr-67*/L3).

## Supplemental Method: Detailed Protocol For Single-Cell RT-PCR

### General notes

Although our method is closely similar to that of Dulac and Axel (4), we have had several requests for our detailed protocol, and thus include it here.

There are two materials in this protocol which readers may be tempted to replace with cheaper substitutes. These reagents are Platinum Taq DNA polymerase, and filter-protected pipet tips. However, for this procedure to succeed reliably, Platinum Taq or an equivalent polymerase, rather than a cheaper generic Taq polymerase, must be used in the RT-PCR. We have had at least one coworker disregard this advice and end up wasting time and scarce cells. We suspect this is because ordinary Taq is more susceptible than Platinum Taq to primer-dimer artifacts, which are a very high risk in single-celled RT-PCRs with low annealing temperatures and high initial ratios of primer to substrate.

We also urge that filter-protected pipet tips be used throughout the procedure, not merely during the RT-PCR but during all preparatory steps in which reagents for the RT-PCR are made, because unfiltered pipet tips allow PCRs to be taken over by aerosol-borne products of previous PCRs (38). The reader should remember that this is a procedure aimed at getting very rare transcripts out of single cells, and that these transcripts must be amplified out of a sea of contaminants and artifacts. Moreover, it is far more expensive to perform next-generation sequencing on junk than to use filter tips the first time.

We serially dilute oligonucleotide solutions to 100  $\mu\text{M}$  and then 10  $\mu\text{M}$  in  $T_{10}$  (10 mM Tris pH 3.0), store them at  $-20^\circ\text{C}$ ., and routinely thaw only the 10  $\mu\text{M}$  stock for use. We prefer  $T_{10}$  to  $\text{H}_2\text{O}$  because distilled water, unless specifically deionized, can be acidic rather than neutral.

We found that dNTPs from New England Biolabs performed reliably in making stock solutions for RT-PCRs.

The dNTPs in the reverse transcription step are at a very low concentration. We found that successful RT-PCRs declined if an aliquot of dNTPs was used even twice. We thus make many small aliquots of dilute dNTPs, freeze them all, only thaw one aliquot of dilute dNTPs for a given reverse transcription step, and then throw it away.

More recent single-cell RT-PCR protocols have been developed which may well have superior sensitivity or reliability to the protocol given here, and which readers should consider using (39, 40). We consider the main advantages of this protocol to be its simplicity and robustness.

### Set up reagents (before Day 1):

1. Make RNase-free  $\text{H}_2\text{O}$ , TE, and  $T_{10}$ .  $\text{H}_2\text{O}$  should be glass-distilled and autoclaved. TE should be made by standard means (41) and autoclaved.  $T_{10}$  is simply TE without EDTA, i.e., 10 mM Tris pH 8.0.

Each solution should be made RNase-free after autoclaving by filtering twice through two 0.2- $\mu\text{m}$  Nalgene CN nitrocellulose filter units (not tissue-culture filters, and not 0.45- $\mu\text{m}$  filters; VWR, catalog number 28199-076). Solutions can then be stored at  $4^\circ\text{C}$ . or room temperature. In our experience, solutions prepared this way are RNase-free enough to allow rare RNAs of up to  $\sim 10$  kb in size to remain intact (42). There are two different reasons why this method may work. The first is that the nitrocellulose filter, unlike filters used for tissue culture medium, is likely to absorb trace proteins; in particular, it is likely to absorb trace RNases which have survived autoclaving. The second is that at least some "RNase" contamination may be due to the

blooming of bacterial spores that survive autoclaving and later come to life in a solution; double-filtering is likely to purge solutions of such spores. In any event, double-filtering is more convenient than DEPC treatment, and can be easily adapted to any filterable aqueous solution.

2. Order reagents for RT-PCR. For this protocol, we used the following reagents from these specific suppliers:

Platinum Taq Polymerase from Invitrogen. 500 reactions, 5 U/ul, catalog number 10966-034.

10x PCR buffer, from Invitrogen (included with Platinum Taq Polymerase).

50 mM MgCl<sub>2</sub>, from Invitrogen (included with Platinum Taq Polymerase).

AMV reverse transcriptase (AMV-RT) from New England Biolabs. 500 U, catalog number M0227 T.

M-MuLV reverse transcriptase (MuLV-RT) from New England Biolabs. 200 U/μl, catalog number M0253S.

MuLV-RT reaction buffer from New England Biolabs (included with MuLV-RT).

Anti-RNase from Ambion, 2500 U (15-30 U/μl), catalog number AM2690.

Stop RNase Inhibitor from 5 PRIME, 2000 U (1x 500 μl; 4 U/μl), catalog number 2500200.

Terminal Transferase (TdT) from New England Biolabs. 500 U, catalog number M0315 S.

2.5 mM CoCl<sub>2</sub> from New England Biolabs (included with Terminal Transferase).

10x terminal transferase buffer (NEBuffer 4) from New England Biolabs (included with Terminal Transferase).

Oligo(dT)<sub>12-18</sub> primer from Invitrogen, catalog number SKU# 18418-012.

dNTP solution set (250 μl apiece of 100 mM dATP, dCTP, cGTP, and dTTP) from New England Biolabs; catalog number N0446S.

Pre-lubricated, DNase- and RNase-free 1.7-ml microfuge tubes from Sorenson Bioscience; catalog number 1170.

AeroGuard Aerosol-Barrier Pipet Tips from National Scientific Supply Company, 0.1-10.0 μl, pack of 960, catalog number UN0011-MRS.

AeroGuard Aerosol-Barrier Pipet Tips from VWR. 1-30 μl, pack of 960, catalog number 53502-902; 1-140 μl, pack of 960, catalog number 53502-901; 200-1000 μl, pack of 1000, catalog number 53502-905.

Bovine Serum Albumin (nuclease-free) from Roche Applied Science. 20 mg/ml, catalog number 10711454001.

Igepal CA-630 (Nonidet-P40 substitute) from USB. 500 ml, catalog number 19628.

Triton X-100, molecular biology grade, Sigma, cat. no. T8787.

Qiagen MinElute PCR Purification Kit, catalog number 28004; or Qiagen Qiaquick PCR Purification Kit, catalog number 28104. While we used MinElute for this study, Qiaquick may be better at removing oligonucleotides, and may thus be preferable.

3. Order AL1 primer. Its sequence is: 5'-ATT-GGA-TCC-AGG-CCG-CTC-TGG-ACA-AAA-TAT-GAA-TTC-TTT-TTT-TTT-TTT-TTT-TTT-TTT-TTT-3'.

4. Order 5' and 3' primers for two adjacent exons of a control positive gene. In our protocol, this gene was *rpl-17* from *C. elegans*, and was targeted with the following primers: RPL17TEST01, 5'-CAC-CTC-GTT-ATT-GAG-CAC-ATC-AAC-GTT-CAA-3'; and RPL17TEST02, 5'-GGC-

ATC-ATC-GGT-TGG-CTT-GGA-GAC-AA-3'. These primers are expected to amplify a product of ~155 nt from cDNA (e.g., valid RT-PCR products) but one of ~390 nt from genomic DNA. BlastN showed no close matches of these primers to any other amplicons in the genome. One can thus use them with genomic DNA as a positive control for amplification, while distinguishing its product from amplified cDNA.

5. Make a stock 100  $\mu$ M AL1 primer solution in RNase-free T<sub>10</sub>. Note that 2.7  $\mu$ l of 100  $\mu$ M AL1 equals 5  $\mu$ g of AL1. Make stock 100  $\mu$ M and 10  $\mu$ M primer solutions for RPL17TEST01 and RPL17TEST02. Store all oligonucleotide solutions at -20° C.

6. Make stock primer mix, for reverse transcription step:

- 5.0  $\mu$ l 100 mM dATP
- 5.0  $\mu$ l 100 mM dCTP
- 5.0  $\mu$ l 100 mM dGTP
- 5.0  $\mu$ l 100 mM dTTP
- 19.6  $\mu$ l of 0.5  $\mu$ g/ $\mu$ l oligo(dT)<sub>12-18</sub> primer
- 0.4  $\mu$ l H<sub>2</sub>O [with 2.0- $\mu$ l pipettor]

Dispense into 1.5  $\mu$ l aliquots, and store at -20° C. between uses.

The amounts of dNTPs in this mixture, after being diluted 25-fold for the reaction itself, are deliberately low. This is in order to bias the reverse transcription towards making equally short copies (0.5-1.5 kb) of all poly(A)<sup>+</sup> mRNAs, regardless of their actual length. A practical implication of this is that reusing the same aliquot is unreliable; even a small amount of degradation of the dNTPs turns a limited reverse transcription step into a failed reverse transcription step.

7. Make 2x tailing buffer, with added cobalt:

- 20.0  $\mu$ l of 10x terminal transferase buffer (NEBuffer 4, New England Biolabs)
- 20.0  $\mu$ l 2.5 mM CoCl<sub>2</sub> (New England Biolabs)
- 1.5  $\mu$ l 100 mM dATP (New England Biolabs)
- 47.5  $\mu$ l H<sub>2</sub>O

Store at -20° C. between uses. 2x tailing buffer should give a final concentration of 10 U/4.5  $\mu$ l when mixed with terminal transferase (TdT) enzyme. For New England Biolabs TdT (20 U/ $\mu$ l), mix 0.5  $\mu$ l enzyme with 4.0  $\mu$ l 2x tailing buffer.

8. Make 1x RNase-free dissection buffer (1x XM2; (3)), with the following composition: 145 mM NaCl; 5 mM KCl; 1 mM CaCl<sub>2</sub>; 5 mM MgCl<sub>2</sub>; 10 mM HEPES; 20 mM D-glucose; pH 7.2.

9. Program PCR machine. Given pre-dissected, frozen cells, one can run both reactions on a single reserved machine on a single day. The first half of this PCR has a theoretical run time of 4 hours and 35 minutes, but (in our experience) a real run time of 5 hours. The second half has a theoretical run time of 3 hours and 45 minutes, but in practice is most conveniently run overnight.

Set up the following SSPCR program:

1. 94° C., 30".
2. 94° C., 30".
3. 42° C., 2'.

4. 72.0° C., 6' + 10"/cycle.
5. Go back to step 2, 24x.
6. 42° C., 1 hr. [Enzyme boost step, without overt mixing.]
7. 94° C., 30".
8. 94° C., 30".
9. 42° C., 2'.
10. 72° C., 6'.
11. Go back to step 8, 24x.
12. 4° C., 18 hr.
13. Stop.

**Dissections (Day 1):**

1. Set up reagents for snap-freezing dissected samples: a small container of liquid nitrogen (a thermos flask is ideal, but an ice bucket will do if necessary; and an ice bucket with well-ground dry ice. Do not expect cells to remain intact if kept on wet ice at 4° C. after dissection.

2. Label pre-lubricated RNase-free microfuge tubes into which to put dissected cells. Cells will be deposited into a small volume (~1 µl) of RNase-free dissection buffer.

3. Mix 1x RNase-free dissection buffer (1x XM2) with RNase inhibitors and nuclease-free BSA for the dissections:

- 48.5 µl XM2
- 0.5 µl Anti-RNase inhibitor (15-30 U/µl)
- 0.5 µl Stop RNase Inhibitor (30 U/µl)
- 0.5 µl BSA

The BSA is meant to nonspecifically bind sticky sites and prevent rare cellular RNAs from being lost. Do not use DTT, even though some protocols recommend, it, because it clogs dissection needles.

4. Dissect cells (including one mock dissection as a negative control, if possible) into tubes labelled 1 to around 15, keeping track in one's notebook of which tubes were actually used for what cells. Use a pre-lubricated microfuge tube for each dissection, to help ensure that tiny aliquots of cellular material (e.g., rare RNA) do not stick to the tube walls or otherwise get lost.

The detailed dissection protocol closely follows that of Lockery and Goodman (3), but with the following differences. Cells that are tightly bound to their neighbors should be severed from them before the dissection itself, by using laser microsurgery (43) to ablate neighboring cells. Pipets are left blunt (and thus able to take up a dissected cell) rather than polished into being patch pipettes. A second dissection near the head is not necessary if the cell in question is associated with the gonad (as the linker cell is), since the initial abdominal cut should free the gonad immediately. Finally, a nontoxic cyanoacrylate glue, such as PeriAcryly®90 (GluStitch Inc., catalog number P-ACRYL5(V)CE), is used to glue down worms.

5. Spin down and snap-freeze each newly dissected cell. After each dissection, spin the cell(s) down briefly. Then immediately snap-freeze the cell's tube by immersion in liquid N<sub>2</sub>. Move the frozen cells to -80° C. (on well-ground dry-ice in a ice bucket), and store them at -80° C. until amplification. Typically, it will be most convenient to do dissections on one day, then start

RT-PCR on a later day. Cells can be safely kept at  $-80^{\circ}\text{C}$ . for up to a few weeks, or even shipped on dry ice from one location to another (which can be useful when the dissection and the amplification must be done in different laboratories).

### **Reverse-transcription and RT-PCR (Day 2, earlier)**

The first steps of RT-PCR can be done most efficiently if one has water baths set to  $37^{\circ}\text{C}$ . and  $65^{\circ}\text{C}$ ., along with dedicated floaters, so that one can readily pick up 1-2 floaters of tubes rather than transfer samples tube by tube. Also, a floater of tubes can be moved from one water bath to another of a given temperature at once, whereas hand-transferring samples tube by tube smears out step times. Alternatives to water baths or floaters are acceptable if they soak the entire tube in the given temperature and allow rapid changes of heat.

For experiments using  $\sim 10$  cells or cell equivalents, a small glass dish or Tupperware tub with distilled water in it, on one's desktop, makes the best (most convenient) room-temperature water bath. It can be used at one's bench and then carried over to other water baths before transferring floaters from it.

Unless one has thin fingers and fine muscular control, it is probably a good idea to carry out most of the steps below in 1.5-ml tubes, even though the final PCR will be carried out in 0.5-ml tubes with thin walls. We routinely use 1.5-ml tubes up to the very end of setting up the reaction, transfer reactions to 0.5-ml tubes for the PCR itself, and then transfer them back after the PCR to 1.5-ml tubes for long-term storage at  $-20$  or  $-80^{\circ}\text{C}$ .

1. Plan appropriate reactions. In addition to amplification of dissected cells, there should be several controls.

First of all, there should be a known dilute RNA sample from the organism of interest, which one can reliably use as a positive control for amplification with reverse transcriptase (+control RNA, +RT). In our case, we used diluted whole RNA that we had previously extracted from starved mass wild-type (N2) *C. elegans* larvae, which we had already shown to work well in standard RNA-seq (6). Since this RNA contained transcripts from many different cell types, any gene strongly expressed both in our cell type of interest (linker cells) and in the mass larval RNA sample was likely to be housekeeping, and could be classified as such.

There should be another control with reverse transcriptase but no substrate (either a mock dissection, or just  $\text{H}_2\text{O}$ ), and a third control with no reverse transcriptase. These provide a check against spurious amplification or contaminants in one's reaction mix.

2. Set up reagents. Before starting, get a wet ice bucket; make sure the  $37^{\circ}\text{C}$ . bath is well watered; get the  $65^{\circ}\text{C}$ . bath set up; and have a "bath" of room-temperature water for the oligo-T annealing step. Have labelled, pre-lubricated, RNase-free microfuge tubes for the reactions. Have some standard way to label PCRs reliably (e.g., the system described below).

3. Set up a new 1/25 dilution of new stock primer mix:

1.0  $\mu\text{l}$  stock primer mix

2x 12.0  $\mu\text{l}$   $\text{H}_2\text{O}$

For greater accuracy, one can pipet 12.0  $\mu\text{l}$  twice with a 20- $\mu\text{l}$  pipettor, rather than pipet 24.0  $\mu\text{l}$  once with a 200- $\mu\text{l}$  pipettor. The stock primer mix should from an aliquot freshly thawed, used once, and then discarded after this experiment.



4. Set up cDNA-lysis buffer. For  $\leq 10$  samples, set up 50  $\mu\text{l}$ :
  - 40.5  $\mu\text{l}$  H<sub>2</sub>O
  - 5.0  $\mu\text{l}$  MuLV-RT reaction buffer, 10x
  - 2.5  $\mu\text{l}$  10% v/v Igepal CA-630 [This is a substitute for NP40.][Vortex the tube containing the above components, and microfuge the tube, before adding the following components.]
  - 0.5  $\mu\text{l}$  Anti-RNase inhibitor (15-30 U/ $\mu\text{l}$ )
  - 0.5  $\mu\text{l}$  Stop RNase Inhibitor (30 U/ $\mu\text{l}$ )
  - 1.0  $\mu\text{l}$  1/25 dilution of new stock primer mixGently mix the full solution by inverting its tube or flicking its tube with a finger; then microfuge the tube's contents down.
5. Make 1:1 v:v mix of AMV- and MuLV-RT. Viscosity of these solutions at  $-20^{\circ}\text{C}$ . makes aliquotting inefficient. To compensate for this, make a slight excess of mix. E.g., for 5 reactions, mix 1.5  $\mu\text{l}$  AMV-RT + 1.5  $\mu\text{l}$  MuLV-RT.
6. Keep the cDNA-lysis buffer and the AMV-RT/MuLV-RT mix on ice until use.
7. Put all vials containing frozen single cells in room-temperature water bath, and let them thaw.
8. Aliquot 4.0  $\mu\text{l}$  of pre-chilled cDNA-lysis buffer to each tube with  $\sim 1.0$   $\mu\text{l}$  substrate -- whether that substrate is blank H<sub>2</sub>O, dilute control RNA, or cells. Briefly spin down all tubes; flick each tube gently with one's finger to mix contents; spin the tubes again. Warm them in a floater rack in a room-temperature water bath for a few seconds.
9. Lyse the cells by moving them, in their floater rack, to a 65 C water bath for 1'.
10. Anneal oligo-T, by immediately moving the tubes in their rack to a room-temperature water bath for 1'. Then put the tubes on ice.
11. Microfuge the tubes for 2' at 4° C.
12. Add 0.5  $\mu\text{l}$  AMV-RT/MuLV-RT mix apiece to all PCR reactions except the (highly recommended) non-RT control. Put tubes on ice. Flick and spin to get well mixed.
13. Incubate at 37° C. for exactly 15'.
14. Incubate the reaction tubes in a water bath for 10' at 65° C.
15. Put tubes on ice. Microfuge for 2' at 4° C.
16. Mix tailing/transferase solution. For 5 reactions mix:
  - 2x 12.0  $\mu\text{l}$  2x tailing buffer
  - 3.0  $\mu\text{l}$  Terminal transferase, NEB, 20 U/ $\mu\text{l}$For 15 reactions mix:
  - 72.0  $\mu\text{l}$  2x tailing buffer

9.0  $\mu\text{l}$  Terminal transferase, NEB, 20 U/ $\mu\text{l}$

Again, it is more accurate to aliquot 2x12.0  $\mu\text{l}$  than 24.0  $\mu\text{l}$ .

17. Add 4.5  $\mu\text{l}$  of tailing/transferase solution to each reaction tube. Flick and spin to get well-mixed.

18. Incubate each tube at 37° C. for 15'.

19. Prepare 5% Triton-X100. While the previous step is going on, mix 5.0  $\mu\text{l}$  Triton-X100 and 95.0  $\mu\text{l}$  H<sub>2</sub>O. Since Triton-X100 is viscous and does not mix easily with water at room temperature, this requires successive pre-heating of aliquots of H<sub>2</sub>O and Triton-X100, and then of the 5% mixture, to get the former to pipet accurately and the latter to mix quickly. Preheating of microfuge vials containing small amounts of H<sub>2</sub>O and Triton-X100 can be done in a 65° C. water bath.

20. Set up labeled thin-walled tubes for PCR.

21. To inactivate the TdT, incubate reactions for 20' at 65° C. (75° C. may be a better temperature for inactivation, but the protocol we adapted used 65° C.)

22. Microfuge for 2' at 4° C.

23. Set up PCR reactions. Do all PCR mixes in pre-lubricated, RNase-free microfuge tubes in order to prevent loss of reaction materials. Use all 10  $\mu\text{l}$  of each finished reverse transcription reaction, to add to 90  $\mu\text{l}$  of PCR mix and make a 100  $\mu\text{l}$  final reaction volume.

24. Make a fresh PCR mix. For N reactions, premix 1.1xN aliquots to prevent shortfalls due to imprecise micropipetting.

| Material:                            | 1x rxn.            | 5 rxns.:              | 15 rxns, in 2 mixes:                  |
|--------------------------------------|--------------------|-----------------------|---------------------------------------|
| H <sub>2</sub> O                     | 65.0 $\mu\text{l}$ | 4x 89.5 $\mu\text{l}$ | 5x 117 $\mu\text{l}$ [ <b>twice</b> ] |
| 10x PCR buffer                       | 10.0 $\mu\text{l}$ | 55.0 $\mu\text{l}$    | 82.5 $\mu\text{l}$ ["]                |
| 50 mM MgCl <sub>2</sub>              | 5.0 $\mu\text{l}$  | 27.5 $\mu\text{l}$    | 41 $\mu\text{l}$ [etc.]               |
| 20 mg/ml BSA                         | 0.5 $\mu\text{l}$  | 2.8 $\mu\text{l}$     | 4.1 $\mu\text{l}$                     |
| -----mix here before proceeding----- |                    |                       |                                       |
| 100 mM dATP                          | 1.0 $\mu\text{l}$  | 5.5 $\mu\text{l}$     | 8.3 $\mu\text{l}$                     |
| 100 mM dCTP                          | 1.0 $\mu\text{l}$  | 5.5 $\mu\text{l}$     | 8.3 $\mu\text{l}$                     |
| 100 mM dGTP                          | 1.0 $\mu\text{l}$  | 5.5 $\mu\text{l}$     | 8.3 $\mu\text{l}$                     |
| 100 mM dTTP                          | 1.0 $\mu\text{l}$  | 5.5 $\mu\text{l}$     | 8.3 $\mu\text{l}$                     |
| 5% Triton X-100                      | 1.0 $\mu\text{l}$  | 5.5 $\mu\text{l}$     | 8.3 $\mu\text{l}$                     |
| Platinum Taq**                       | 2.0 $\mu\text{l}$  | 11.0 $\mu\text{l}$    | 16.5 $\mu\text{l}$                    |
| 100 $\mu\text{M}$ AL1****            | 2.7 $\mu\text{l}$  | 14.9 $\mu\text{l}$    | 11.1 + 11.2 $\mu\text{l}$             |

\*The recipe here gives 5.5x the needed amounts for a single reaction, since losses of up to 10% through pipetting can cause shortfalls.

\*\*In other words, make two mixes of 8.25x the reaction mixture needed for a single reaction, each in an sterile microfuge tube.

\*\*\*Dulac's original protocol required 2.0  $\mu$ l for the first step and 1.0  $\mu$ l for the boost. This is 5x as much Taq as Invitrogen's manual says needed (0.4  $\mu$ l per 100- $\mu$ l reaction; at most, up to 1.0  $\mu$ l). However, this protocol uses Dulac's enzyme amounts.

\*\*\*\*This is 5  $\mu$ g of AL1 primer.

Flick and microfuge them to get them well-mixed.

25. Aliquot 90  $\mu$ l of PCR mix to each reaction tube, with a fresh pipet tip for each aliquot. Flick and microfuge them to get them well-mixed.

26. Transfer the reactions from 1.5-ml tubes to thin-walled 0.5-ml PCR tubes. Microfuge the reactions down briefly to prevent bubbling.

27. Run the first half of the SSPCR program for 5 hours (check it at 4 hr., 45 min.; it should be done in exactly 5 hr.) before hot boost at 42° C.

### **Second round of RT-PCR (Day 2, later):**

1. As soon as the first half of SSPCR ends, add a boost of 1.0  $\mu$ l Platinum Taq/reaction. Keep the reaction at 42° C. to prevent primer-dimer. Do this one tube at a time, quickly, while the other tubes remain on the 42° C. block, and return each tube to the block immediately after pipetting. Do not try to mix the enzyme into solution; simply pipet it into the top of the tube, let it sink to the bottom of the tube, and let heat convection mix it in. After all tubes have been given an enzyme boost, seal the PCR machine and prompt the machine to go on to step 7 of SSPCR.

2. Run the rest of SSPCR. This will typically run overnight.

### **Initial results of RT-PCR (Day 3):**

1. Store the bulk of reactions at -20° C. until further work; do long-term storage at -80° C. For convenient storage and handling, it will probably be best to pipet the completed reactions back into 1.5-ml microfuge tubes.

2. Run 10.0  $\mu$ l of each reaction per lane on a 1.5% EtBr-stained gel, between flanking lanes of 100-bp molecular weight markers.

3. Photograph and evaluate the gel. Any successful RT-PCR will give a smear of DNA from 0.5-1.5 kb in size, which should not appear in negative controls. Ideally, negative controls should be blank. However, if bands appear in the negative controls, this is not necessarily a sign of failure; there may be cryptic poly(A)<sup>+</sup> RNAs in at least some reagents used that were amplified in the controls. What is really crucial is that broad smears should appear in positive controls and valid cell amplifications, and that secondary PCRs should give cDNA-sized products only from valid amplifications.

### **Secondary PCRs (Day 3 or later):**

1. Test successful RT-PCRs for the presence or absence at least one diagnostic gene, with gene-specific oligonucleotide pairs. These should span an intron and amplify 300-500 bp, with the 5'-most one being targetted  $\leq$ 500 bp from the predicted/known end of the transcript, with blank and genomic DNA as control substrates. We have found that *rpl-17* in *C. elegans* is a

highly robust positive control that fits these criteria. Cell-specific genes, particularly if they are expressed at low levels, may not show up reliably in secondary PCR of even a valid reaction, because individual cells have highly variable patterns of amplification.

2. Purify successful PCRs with the Qiagen MinElute or the Qiagen Qiaquick PCR Purification Kit. Quantitate them with Qubit. For both purification and quantitation, follow manufacturer's instructions. We find Qubit quantitation to be more reliable than other methods such as Nanodrop.

3. Carry out next-generation sequencing, either on individual cleaned RT-PCRs, or on a quantitatively balanced pool of them (e.g., 1.0 µg apiece for each reaction from a given cell type, pooled into a single solution for sequencing). The details of sequencing will depend on which sequencing facility one is using. Generally, though, Illumina libraries should be constructed and sequenced as if they were meant for standard RNA-seq (6): i.e., the inserts should be ~300 nt in size (i.e., they should have ~200 nt of real insert and 2x50 nt of flanking adapters), and the reads should be single-end. We used 38-nt reads in this study, but 50-nt reads have recently become more common and are probably preferable.

### **Labelling PCRs reliably**

The above protocol entails many different PCRs, which rapidly fill one's freezer boxes and are easy to confuse if not tracked stringently. To avoid this problem, we use the following labeling method, adopted from early *Drosophila* genetics (where it was used to identify newly discovered alleles). We label PCRs by the code "XX [lowercase a-l] YY.ZZ" which denotes the last two digits of the year (XX), the month (a = January, l = December), the day (YY), and the reaction number for that day (ZZ). Thus, "12f20.01" would denote PCR reaction number 1 on June 20th, 2012. This code ensures that the exact date and identity of any PCR tube is identifiable simply by reading its lid, and lowers the risk of confusing PCRs.

**Supplemental References**

1. Lewis JA & Fleming JT (1995) Basic culture methods. *Methods Cell Biol.* 48:3-29.
2. Kato M & Sternberg PW (2009) The *C. elegans* *tailless*/Tlx homolog *nhr-67* regulates a stage-specific program of linker cell migration in male gonadogenesis. *Development* 136(23):3907-3915.
3. Lockery SR & Goodman MB (1998) Tight-seal whole-cell patch clamping of *Caenorhabditis elegans* neurons. *Methods Enzymol.* 293:201-217.
4. Dulac C & Axel R (1995) A novel family of genes encoding putative pheromone receptors in mammals. *Cell* 83(2):195-206.
5. Hall D, Altun, ZF (2008) *C. elegans Atlas* (Cold Spring Harbor Laboratory Press, Cold Spring Harbor, New York).
6. Mortazavi A, Williams BA, McCue K, Schaeffer L, & Wold B (2008) Mapping and quantifying mammalian transcriptomes by RNA-Seq. *Nat Methods* 5(7):621-628.
7. Langmead B, Trapnell C, Pop M, & Salzberg SL (2009) Ultrafast and memory-efficient alignment of short DNA sequences to the human genome. *Genome Biol* 10(3):R25.
8. Flicek P, *et al.* (2011) Ensembl 2011. *Nucleic Acids Res.* 39(Database issue):D800-806.
9. Mortazavi A, *et al.* (2010) Scaffolding a *Caenorhabditis* nematode genome with RNA-seq. *Genome Res.* 20(12):1740-1747.
10. Yook K, *et al.* (2012) WormBase 2012: more genomes, more data, new website. *Nucleic Acids Res.* 40(D1):D735-D741.
11. Finn RD, *et al.* (2010) The Pfam protein families database. *Nucleic Acids Res.* 38(Database issue):D211-222.
12. Koonin EV, *et al.* (2004) A comprehensive evolutionary classification of proteins encoded in complete eukaryotic genomes. *Genome Biol* 5(2):R7.
13. Bendtsen JD, Nielsen H, von Heijne G, & Brunak S (2004) Improved prediction of signal peptides: SignalP 3.0. *J. Mol. Biol.* 340(4):783-795.
14. Krogh A, Larsson B, von Heijne G, & Sonnhammer EL (2001) Predicting transmembrane protein topology with a hidden Markov model: application to complete genomes. *J. Mol. Biol.* 305(3):567-580.
15. Lupas A (1996) Prediction and analysis of coiled-coil structures. *Methods Enzymol.* 266:513-525.
16. Wootton JC (1994) Non-globular domains in protein sequences: automated segmentation using complexity measures. *Comput. Chem.* 18(3):269-285.
17. Boutros M & Ahringer J (2008) The art and design of genetic screens: RNA interference. *Nat Rev Genet* 9(7):554-566.
18. Ashburner M, *et al.* (2000) Gene ontology: tool for the unification of biology. *Nat. Genet.* 25(1):25-29.
19. Muller J, *et al.* (2010) eggNOG v2.0: extending the evolutionary genealogy of genes with enhanced non-supervised orthologous groups, species and functional annotations. *Nucleic Acids Res.* 38(Database issue):D190-195.
20. Reece-Hoyes JS, *et al.* (2005) A compendium of *Caenorhabditis elegans* regulatory transcription factors: a resource for mapping transcription regulatory networks. *Genome Biol* 6(13):R110.

21. Haerty W, Artieri C, Khezri N, Singh RS, & Gupta BP (2008) Comparative analysis of function and interaction of transcription factors in nematodes: extensive conservation of orthology coupled to rapid sequence evolution. *BMC Genomics* 9:399.
22. Li L, Stoeckert CJ, Jr., & Roos DS (2003) OrthoMCL: identification of ortholog groups for eukaryotic genomes. *Genome Res.* 13(9):2178-2189.
23. Amberger J, Bocchini C, & Hamosh A (2011) A new face and new challenges for Online Mendelian Inheritance in Man (OMIM®). *Hum. Mutat.* 32(5):564-567.
24. Reinke V, Gil IS, Ward S, & Kazmer K (2004) Genome-wide germline-enriched and sex-biased expression profiles in *Caenorhabditis elegans*. *Development* 131(2):311-323.
25. Nishimura H & L'Hernault SW (2010) Spermatogenesis-defective (spe) mutants of the nematode *Caenorhabditis elegans* provide clues to solve the puzzle of male germline functions during reproduction. *Developmental dynamics : an official publication of the American Association of Anatomists* 239(5):1502-1514.
26. Kulkarni M, Shakes DC, Guevel K, & Smith HE (2012) SPE-44 implements sperm cell fate. *PLoS Genet* 8(4):e1002678.
27. Gleason EJ, *et al.* (2012) Developmental genetics of secretory vesicle acidification during *Caenorhabditis elegans* spermatogenesis. *Genetics* 191(2):477-491.
28. Salkoff L, *et al.* (2005) Potassium channels in *C. elegans*. *WormBook* 2005 Dec 30:1-15.
29. Galperin MY & Koonin EV (2004) 'Conserved hypothetical' proteins: prioritization of targets for experimental study. *Nucleic Acids Res.* 32(18):5452-5463.
30. Gertz EM, Yu YK, Agarwala R, Schäffer AA, & Altschul SF (2006) Composition-based statistics and translated nucleotide searches: improving the TBLASTN module of BLAST. *BMC Biol* 4:41.
31. de Hoon MJ, Imoto S, Nolan J, & Miyano S (2004) Open source clustering software. *Bioinformatics* 20(9):1453-1454.
32. Gollub J & Sherlock G (2006) Clustering microarray data. *Methods Enzymol.* 411:194-213.
33. Tibshirani R, Walther G, & Hastie T (2001) Estimating the number of clusters in a data set via the gap statistic. *J. R. Statist. Soc. B* 63:411-423.
34. Saldanha AJ (2004) Java Treeview--extensible visualization of microarray data. *Bioinformatics* 20(17):3246-3248.
35. Ben-Shaul Y, Bergman H, & Soreq H (2005) Identifying subtle interrelated changes in functional gene categories using continuous measures of gene expression. *Bioinformatics* 21(7):1129-1137.
36. Prüfer K, *et al.* (2007) FUNC: a package for detecting significant associations between gene sets and ontological annotations. *BMC Bioinformatics* 8:41.
37. Anders S & Huber W (2010) Differential expression analysis for sequence count data. *Genome Biol* 11(10):R106.
38. Kwok S & Higuchi R (1989) Avoiding false positives with PCR. *Nature* 339(6221):237-238.
39. Tang F, *et al.* (2010) RNA-Seq analysis to capture the transcriptome landscape of a single cell. *Nat Protoc* 5(3):516-535.
40. Islam S, *et al.* (2011) Characterization of the single-cell transcriptional landscape by highly multiplex RNA-seq. *Genome Res.* 21(7):1160-1167.
41. Sambrook JR, D.W. (2001) *Molecular Cloning: a Laboratory Manual*. (CSHL Press, Cold Spring Harbor, NY) 3rd Ed.

42. Schwarz EM & Benzer S (1997) *Calx*, a Na-Ca exchanger gene of *Drosophila melanogaster*. *Proc. Natl. Acad. Sci. U. S. A.* 94(19):10249-10254.
43. Fang-Yen C, Gabel CV, Samuel AD, Bargmann CI, & Avery L (2012) Laser microsurgery in *Caenorhabditis elegans*. *Methods Cell Biol.* 107:177-206.

Figure S1

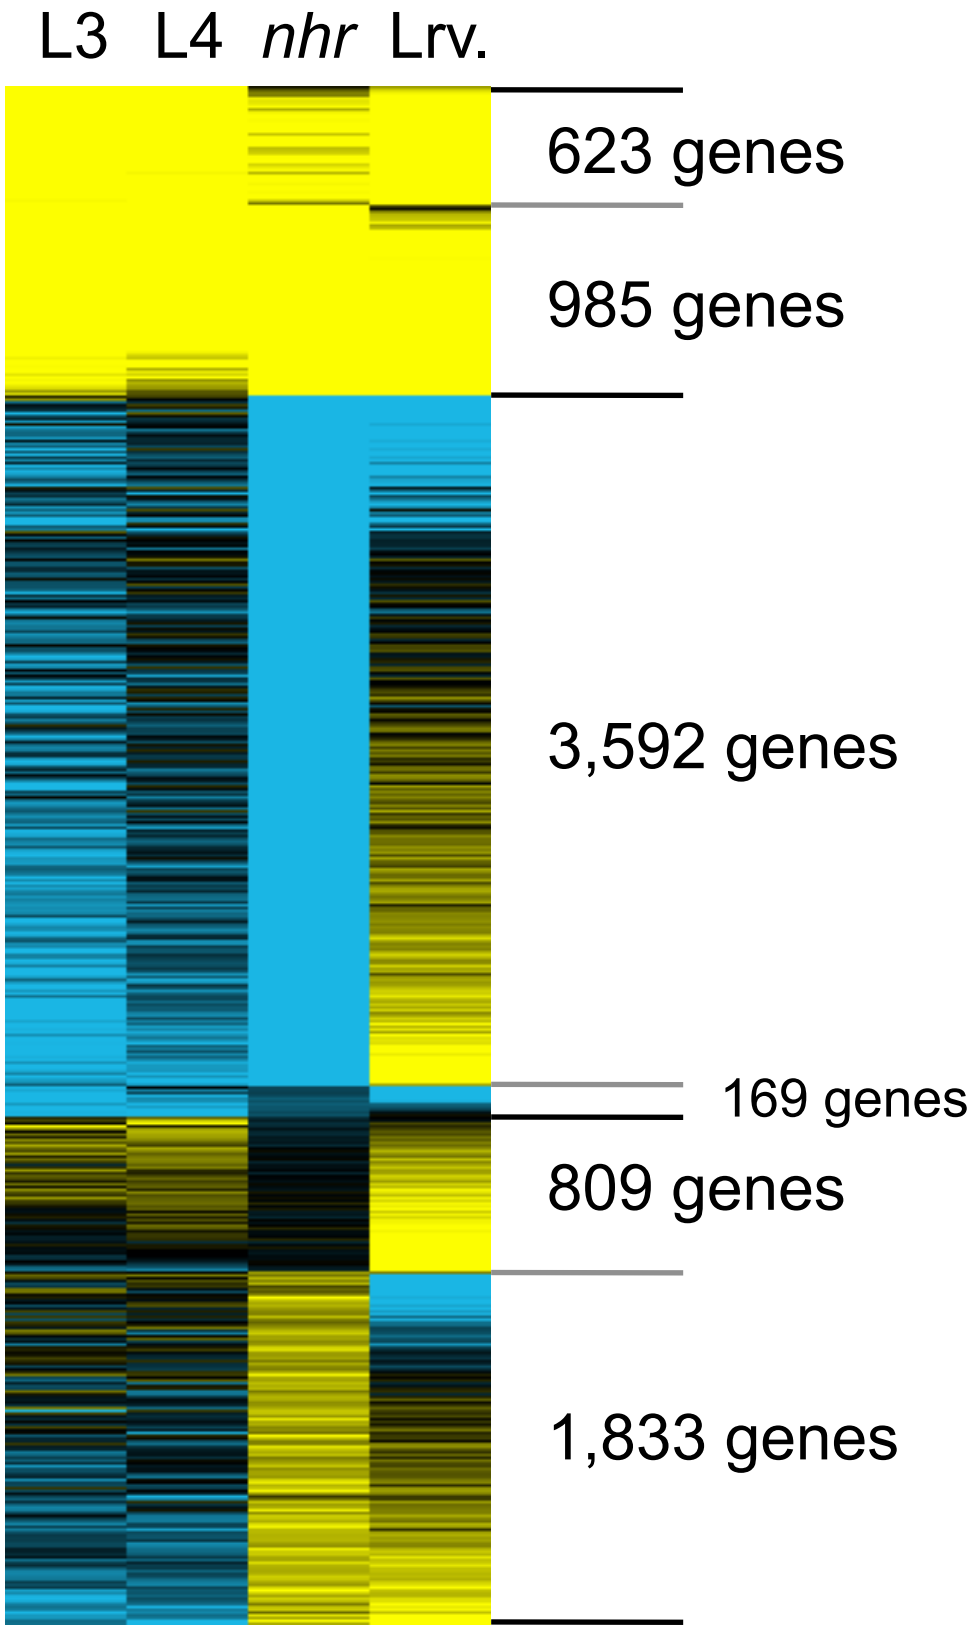



Figure S2

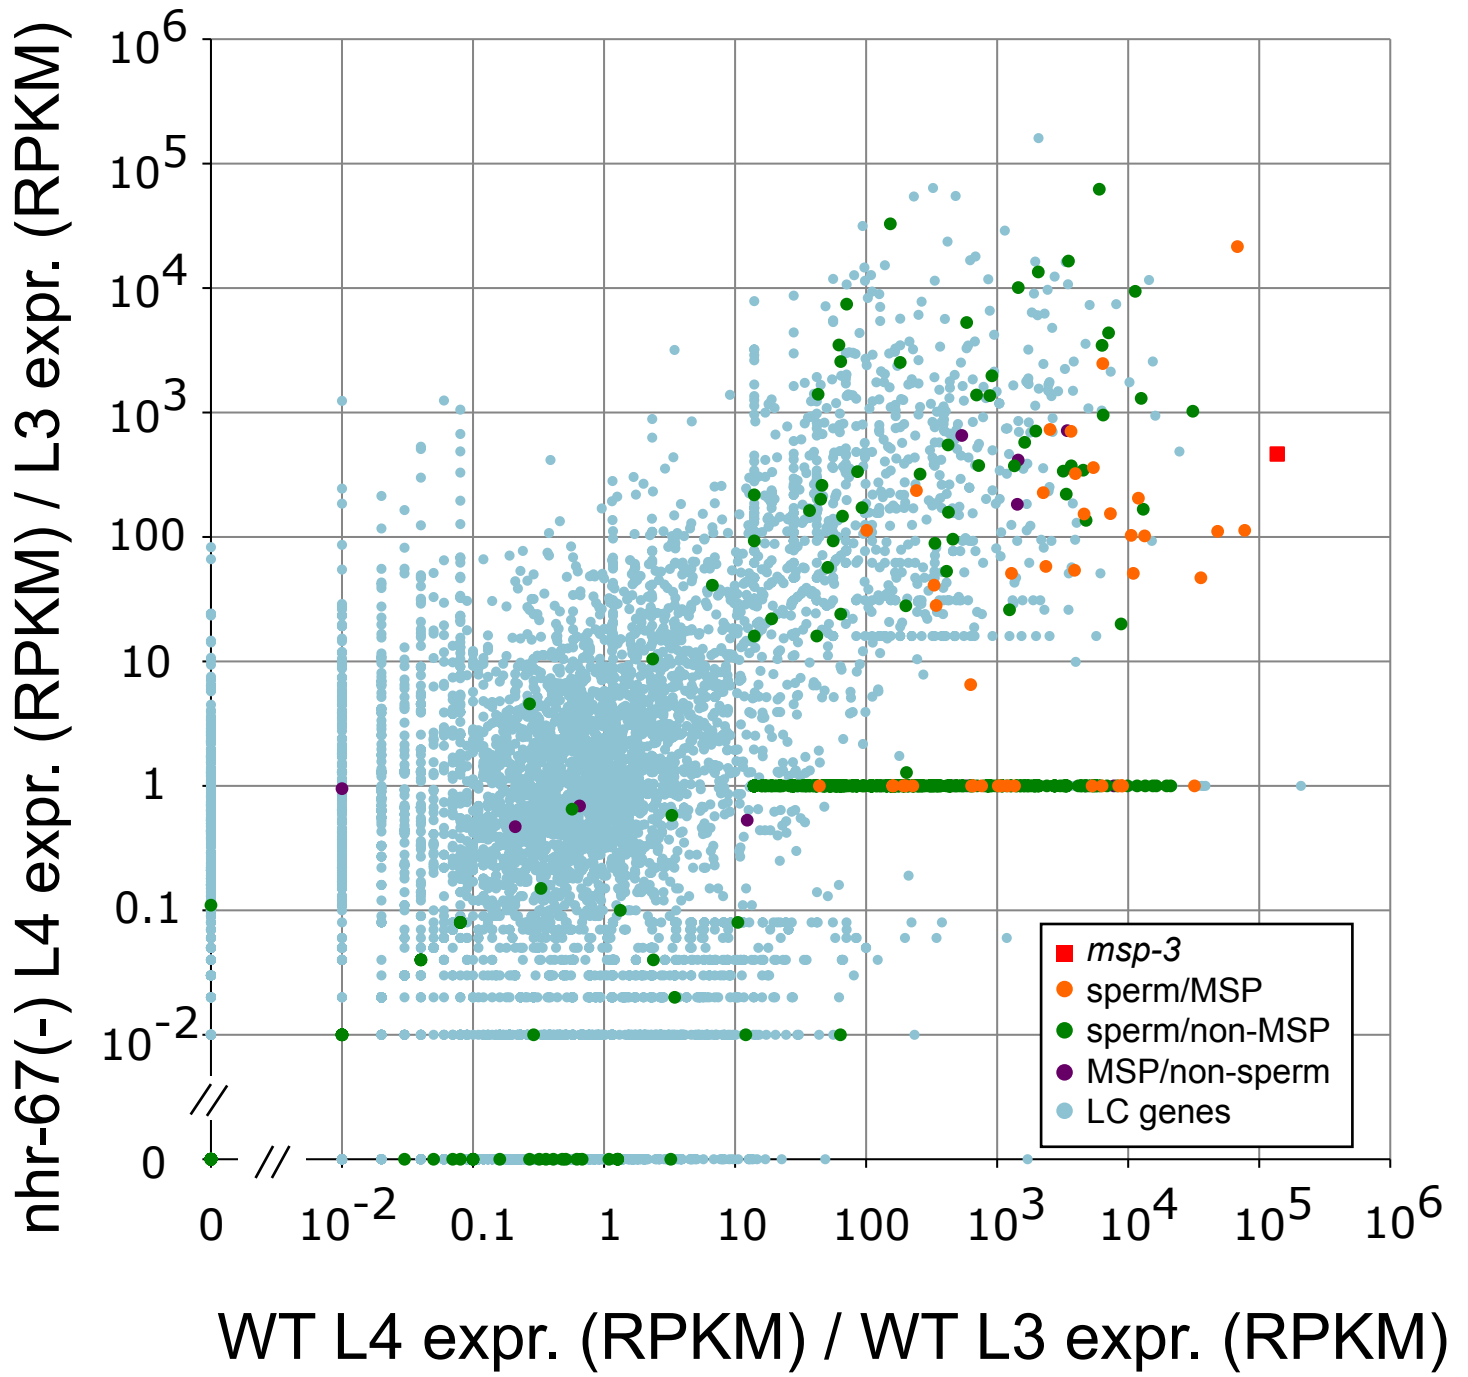

Figure S3

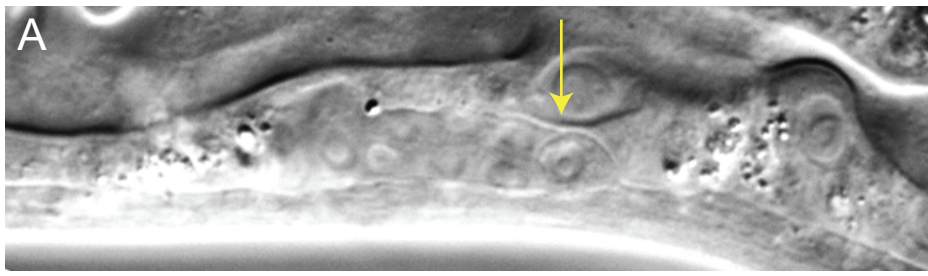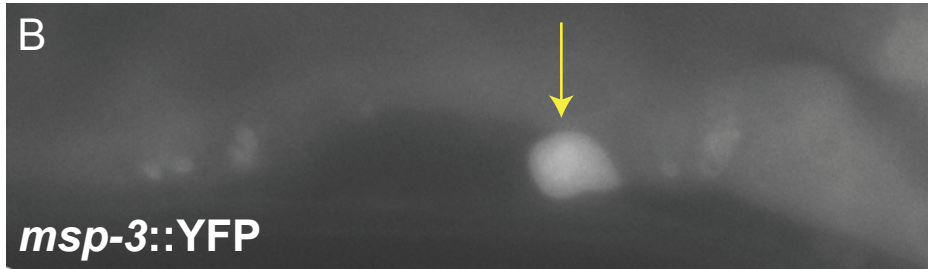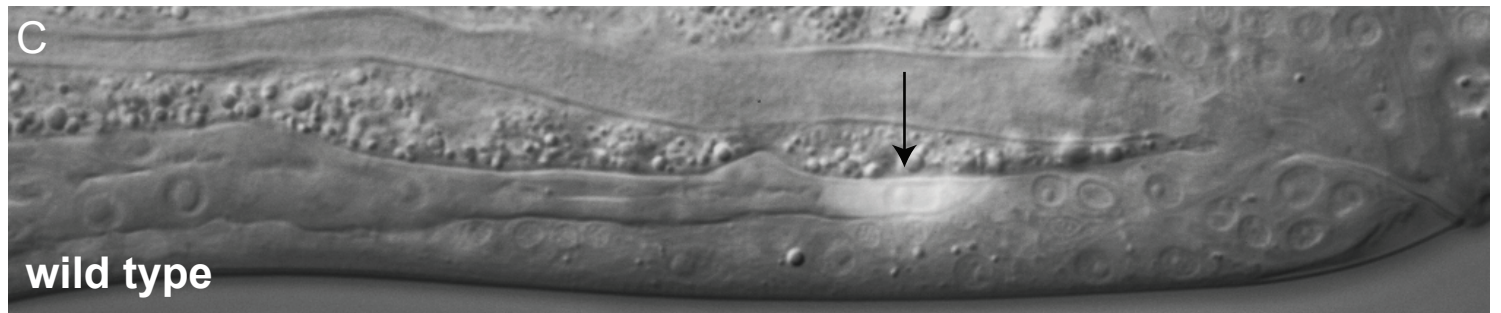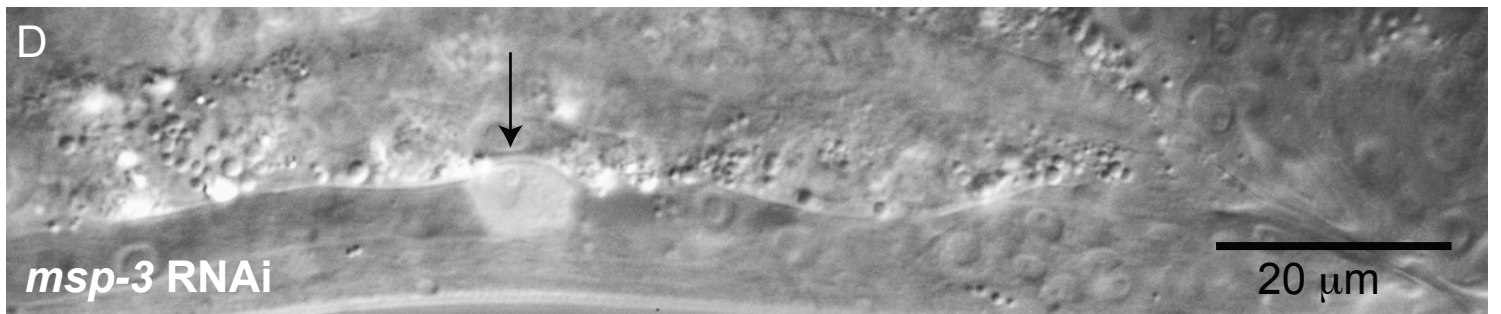

Supplement: 1203045109_sapp.pdf [file 1203045109_sapp.pdf]
